# Supplementary material for: Bay-substituted perylene diimide-based donor–acceptor type copolymers: design, synthesis, optical and energy storage behaviours
Source: Royal Society of Chemistry journal article supplement (doi:10.1039/d4ta06278g), 2024-12-16
Supplement: d4ta06278g1.pdf [file d4ta06278g1.pdf]

## Supplementary Information

### **Bay-substituted perylene diimide based donor-acceptor type copolymers: design, synthesis, optical and energy storage behaviours**

Lalmohan Das <sup>a</sup>, Puspendu Das <sup>a</sup>, Sk Mustak Ahamed <sup>a</sup>, Ayan Datta<sup>a</sup>, Arun Kumar Pal <sup>b</sup>,  
Ayan Datta <sup>b</sup>, and Sudip Malik<sup>a\*</sup>

*<sup>a</sup> School of Applied & Interdisciplinary Sciences (SAIS), Indian Association for the Cultivation of Science, 2A and 2B Raja S. C. Mullick Road, Jadavpur, Kolkata-700032, India. Email: psusm2@iacs.res.in*

*<sup>b</sup> School of Chemical Sciences (SCS), Indian Association for the Cultivation of Science, 2A and 2B Raja S. C. Mullick Road, Jadavpur, Kolkata-700032, India.*

### **Table of content**

|                                                               |         |
|---------------------------------------------------------------|---------|
| 1. General informational about materials and measurement..... | S2-S3   |
| 2. Materials synthesis.....                                   | S3-S6   |
| 3. Spectroscopic characterization .....                       | S7-S17  |
| 4. Physical characterization of polymers.....                 | S18-S20 |
| 5. Morphology study of copolymers.....                        | S21-S22 |
| 6. Electrochemical study.....                                 | S23-S28 |
| 7. Comparison Table.....                                      | S29-S31 |
| 8. Reference.....                                             | S32     |

## 1. General information:

### 1.1 Materials:

3,4,9,10-perylenetetracarboxylic dianhydride, 2-ethylhexylamine, liquid bromine, 4-formylboronic acid, rubeanic acid (dithiooxamide), Pd (PPh<sub>3</sub>)<sub>4</sub>, Pd (dppf)Cl<sub>2</sub>, 2,1,3-benzothiadiazole-4,7-bis (boronic acid pinacol ester), benzene-1,4-diboronic acid, diphenylamine, N-bromo succinimide (NBS), bis-pinacolato diborane, potassium carbonate (K<sub>2</sub>CO<sub>3</sub>) and potassium acetate (KOAC) were purchased from Tokyo chemical industry (TCI) India. The solvents like dichloromethane (DCM), petroleum ether, chloroform (CHCl<sub>3</sub>), methanol (MeOH), tetrahydrofuran (THF), toluene, acetonitrile, acetone, hexane, ethanol (EtOH), dimethyl formamide (DMF), were purchased from Merck. All the solvents except THF and toluene were used after distillation. THF was used after drying under nitrogen with sodium metal and benzophenone. DMF was dried using distillation. The CDCl<sub>3</sub> (Aldrich) was also used as received. For spectroscopic measurement the HPLC grade of solvents were used. The column chromatography was performed on silica (silica gel 100-120 mesh).

### 1.2 Measurement and techniques:

The <sup>1</sup>H and <sup>13</sup>C NMR spectra were performed on 400 MHz Bruker DPX spectrometer using CDCl<sub>3</sub> as solvent and TMS as standard reference with chemical shift given in parts per million (ppm) and solid-state <sup>13</sup>C cross-polarization/magic angle spinning nuclear magnetic resonance (CP/MAS NMR) was performed with 600 MHz Bruker DPX spectrometer. The MALDI-TOF mass spectrometry was studied with Bruker Ultra flex extreme (Bruker Daltonics Pvt. Ltd) in THF solvent using dithranol matrix. The Powder X-ray diffraction (PXRD) experiment was performed in Bruker D-8 Advanced SWAX, Germany diffractometer using Ni-filtered Cu K $\alpha$  ( $\lambda = 1.5406 \text{ \AA}$ ) radiation in the small angle region (0.5°-10°) and (2°-50°) were recorded at a rate of  $(2\theta) = 2^\circ$  per min. FEG-TEM image was recorded by JEM-2100F. FT-IR spectra was recorded on a FTIR instrument (Perkin Elmer, FTIR Spectrometer, S3 Spectrometer Two). Thermogravimetric analysis (TGA) was performed with PerkinElmer Thermogravimetric Analyzer (TGA 4000) with heating rate 10°C/min. under nitrogen atmosphere. DSC was done by Perkin-Elmer DSC 8000. The UV-vis spectroscopy was performed by Agilent Cary 5000 UV-vis NIR spectrophotometer. Emission studies (photoluminescence) in dispersed state and solid state were performed with a Horiba Jobin Yvon Fluoromax 3 spectrometer at corresponding excitation wavelength with slits 2/2.

Fluorescence average lifetimes ( $t_{\text{ava}}$ ) were measured through Time-Correlated Single Photon Counting (TCSPC) with Horiba Jobin Yvon Fluoromax 3 spectrometer with magic angle with 475 nm laser probe in dispersed state. Absolute quantum yield in dispersed state was done using integrated sphere on Edinburgh Instruments (Model: FLS1000-DD-STM). All electrochemical studies such as cyclic voltammetry (CV), electrochemical impedance spectroscopy (EIS) and galvanostatic charge/ discharge (GCD) were performed by using a CHI6087E electrochemical workstation (CH Instrument, USA).

## 2. Materials synthesis:

### 2.1 Synthesis of N, N'-Bis (2-ethylhexyl) perylene-3,4,9,10-tetracarboxylic diimide<sup>1</sup>

(1)

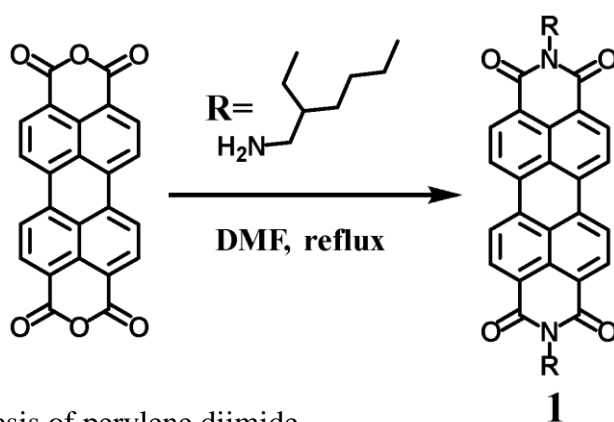

**Fig. S1** Synthesis of perylene diimide.

3,4,9,10-perylenetetracarboxylic dianhydride (2 g, 5.1 mmol) was taken in a two neck round bottom flask and degassed with nitrogen ( $\text{N}_2$ ) 30 mL of dry dimethyl formamide (DMF) was added to the reaction mixture. Then 10 mL (50 mmol) of 2-ethylhexylamine was injected to it and refluxed at  $150^\circ\text{C}$ . After 8h, reaction mixture was allowed to stand for cooling to room temperature. It was poured into 100 mL (1N) HCl solution and stirred for 6 h. The precipitate was filtered by vacuum filtration and washed with 200 mL of 5% NaOH solution. The red precipitate was dried at vacuum the purification of crude product was done by column chromatography ( $\text{CHCl}_3$ : Hexane (1:1) as an eluent). Finally, a red colored pure product was obtained (2.5 g (yield = 80%))

**$^1\text{H}$  NMR (400 MHz,  $\text{CDCl}_3$ )  $\delta$  (ppm):** 8.7 (d, 4H), 8.65 (d, 4H), 4.18-4.11 (m, 4H), 1.97 (br, 2H), 1.33-0.88 (br, 28H).

**$^{13}\text{C}$  NMR (400 MHz,  $\text{CDCl}_3$ )  $\delta$  (ppm):** 163.5, 134.4, 131.3, 129.1, 126.1, 123.1, 122.8, 44.2, 37.9, 30.8, 28.7, 24.1, 22.9, 14.1, 10.6

**MALDI-TOF:** Molecular weight = 614.79 (calculated), found = 617.23 ( $\text{M}+3$ )

## 2.2 1,7-diBromination of N, N'-Bis (2-ethylhexyl) perylene-3,4,9,10-tetracarboxylic diimide<sup>2</sup> (2):

400 mg (0.68 mmol) of **compound 1** was taken in a 250 mL two neck round bottom flask and degassed carefully with nitrogen three times. 20 mL of dry DCM was added to reaction mixture and stirred at room temperature. Then 2.6 mL (46.2 mmol) of liquid bromine was added dropwise to reaction mixture. Then the reaction mixture was refluxed at 70°C for 12 h. The reaction mixture was cooled and poured into 200 mL of saturated sodium thiosulphate pentahydrate solution to consume the excess bromine from the reaction mixture. The mixture was extracted with DCM and the combined organic phase was washed with water followed by brine solution. Organic phase was collected over the anhydrous Na<sub>2</sub>SO<sub>4</sub> and concentrated by reduced pressure. The residue was purified by column chromatography (eluent: PET: DCM = 1:1). The first part was collected which is the mixture of regioisomer **1,7-dibromo** and **1,6-dibromo** of compound 1a. The regioisomerically pure **1,7-dibromo** of compound 1a (compound 2) (300 mg, yield 56%) was obtained by recrystallisation in CHCl<sub>3</sub>: MeOH (v/v 5:1).

<sup>1</sup>H NMR (400 MHz, CDCl<sub>3</sub>) δ (ppm): 9.48 (d, 2H), 8.91 (s, 2H), 8.69 (d, 2H), 4.18-4.11 (m, 4H), 1.95 (br, 2H), 1.37-0.90 (br, 28H)

<sup>13</sup>CNMR (400 MHz, CDCl<sub>3</sub>) δ (ppm): 163.5, 163.1, 138.4, 133.2, 130.4, 129.6, 127.4, 123.6, 123.2, 121.2

MALDI-TOF: Molecular weight = 772.58 (calculated), Found = 771.15(M-1)

## 2.3 1,7-di (4-aldehyde phenyl) of N, N'-Bis (2-ethylhexyl) perylene-3,4,9,10-tetracarboxylic diimide<sup>3</sup> (3):

150 mg (0.19 mmol) of compound **2**, 142.4 mg (0.95 mmol) of 4-formylboronic acid, 330 mg (2.4 mmol) of K<sub>2</sub>CO<sub>3</sub> and 50 mg of Pd (PPh<sub>3</sub>)<sub>4</sub> were taken in a 250 mL two neck round bottom flask and inert carefully with nitrogen. 20 mL dry THF and 2 mL H<sub>2</sub>O were added to reaction mixture and refluxed at 70°C for one day. Then the reaction mixture was cooled and extracted with DCM. The combined organic phase was washed with water followed by brine solution. Then the solution was dried over Na<sub>2</sub>SO<sub>4</sub> and concentrated by reduced pressure. The residue was purified by column chromatography (eluent: PET: DCM = 1:1) to get red color product (**3**) (140 mg yield 77%).

<sup>1</sup>H NMR (400 MHz, CDCl<sub>3</sub>) δ (ppm): 10.15 (s, 2H), 8.64 (s, 2H), 8.18 (d, 2H), 8.08 (d, 4H), 7.78-7.26 (br, 6H), 4.17-4.09 (m, 4H), 1.93 (br, 2H), 1.37-0.88 (br, 28H).

**<sup>13</sup>CNMR (400 MHz, CDCl<sub>3</sub>) δ (ppm):** 191.3, 163.5, 163.4, 148.0, 139.6, 136.1, 134.8, 132.6, 131.4, 130.7, 129.9, 129.0, 122.6, 122.3, 44.3, 37.9, 30.7, 28.7, 24.0, 23.0, 14.1, 10.6

**MALDI-TOF:** M. W=823.0, found=820.79(M-2)

#### 2.4 Synthesis procedure of Polymer, TzTz-PDI:

50 mg (0.06 mmol) of **compound 3** and 20 mg (0.16 mmol) of Rubeanic acid were taken in a two neck round bottom flask and degassed with inert N<sub>2</sub>. 20 ml dry DMF was added to reaction mixture and refluxed at 150°C for two days. After completion the reaction mixture was filtered and washed with 50 mL methanol. Further washing was continued by Soxhlet extraction in methanol, acetone, and hexane. The brown pure product (20 mg) was obtained after drying in vacuum.

#### 2.5 Synthesis procedure of Polymer, Benz-PDI:

300 mg (0.388 mmol) of **compound 2** and 128 mg (0.775 mmol) benzene 1,4-diboronic acid, 300 mg (3.086 mmol) K<sub>2</sub>CO<sub>3</sub> and 22.28 mg (0.019 mmol) of Pd (PPh<sub>3</sub>)<sub>4</sub> were taken in a two neck round bottom flask. The entire setup was made inert by passing N<sub>2</sub>. 30 mL dry THF and 2 mL H<sub>2</sub>O were added to reaction mixture and refluxed at 70°C for 3 days. Then it was cooled to room temperature and poured into cold methanol. The resultant precipitated was filtered by vacuum filtration and washed with excess methanol, hot water and acetone successively. To remove the oligomers Soxhlet extraction was done with methanol, hexane and acetone. The red-colored pure product (100 mg) was dried into vacuum.

#### 2.6 Synthesis procedure of polymer, Btz-PDI<sup>4</sup>:

200 mg (0.259 mmol) of **compound 2**, 352 mg (0.9065 mmol) of 2,1,3-benzothiadiazole-4,7-bis (boronic acid pinacol ester), 332.88 mg (2.40 mmol) K<sub>2</sub>CO<sub>3</sub> and 15 mg (0.013 mmol) Pd (PPh<sub>3</sub>)<sub>4</sub> were taken in a two neck RB. After that same procedure as previous polymer (**Benz-PDI**).

## 2.7 Synthesis of Bis(4-bromophenyl) amine (4):

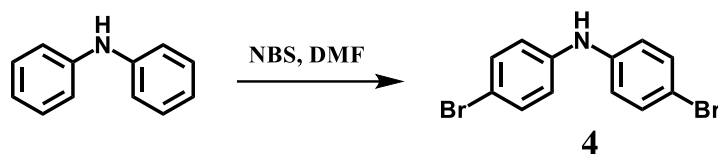

500 mg (2.95 mmol) of diphenylamine was taken in a two neck round bottom flask and was inert with N<sub>2</sub>. 10 mL of dry DMF added to it. The NBS solution (1.15 g (6.5 mmol) of N-bromo succinimide (NBS) was mixed with 10 mL of dry DMF) was added dropwise to the reaction mixture at 0°C and stirred for 3 h. Then, the entire reaction mixture was stirred at 60°C for 8 h. Aliquot was cooled and poured into 200mL of ice cooled water. White precipitate was filtered by vacuum filtration and dried into vacuum oven at 120°C. Further purification was done by column chromatography (stationary phase: silica gel; eluent: PET: DCM = 1:1) to get 675 mg (yield 70%) white crystal.

**<sup>1</sup>H NMR (400 MHz, CDCl<sub>3</sub>) δ (ppm):** 7.37-7.35 (d, 4H), 6.93-6.91 (d, 4H), 5.65 (s, 1H)

**<sup>13</sup>CNMR (400 MHz, CDCl<sub>3</sub>) δ (ppm):** 141.75, 132.35, 119.55, 113.42

**HR-MS (ESI):** Molecular weight = 427.02 found=427.86

## 2.8 Synthesis of bis (4-(4,4,5,5-tetramethyl-1,3,2-dioxaborolan-2-yl) phenyl) amine<sup>5</sup> (5):

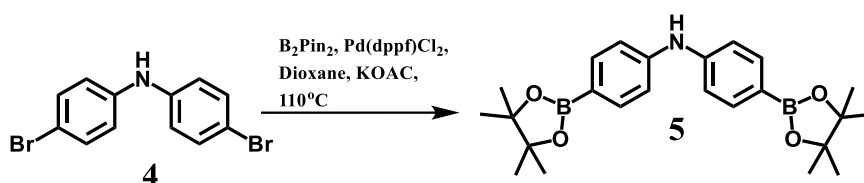

In a two neck round bottom flask, 500 mg (1.52 mmol) of **compound 4**, 1.158 g (4.56 mmol) of bis-pinacolato diborane, 179.01 mg (1.824 mmol) of potassium acetate (KOAc) and 44.5 mg (0.0608 mmol) of Pd(dppf)Cl<sub>2</sub> were taken. The entire system was purged with N<sub>2</sub> gas for 15 mins. 60 mL of dry 1,4-dioxane was added to it and heated up to 110°C for 16 h. After cooled at room temperature reaction mixture was extracted with DCM and brine solution. The combined organic phase was passed over Na<sub>2</sub>SO<sub>4</sub> and concentrated by reduce pressure. Further purification of the residue was done by column chromatography on silica gel and eluent (PET: DCM=1:1) to give 550 mg (yield 84%) white crystal **compound 5**.

**<sup>1</sup>H NMR (400 MHz, CDCl<sub>3</sub>) δ (ppm):** 7.73-7.71 (d, 4H), 7.09-7.04 (d, 4H), 1.33 (br, 24H)

**<sup>13</sup>CNMR (400MHz, CDCl<sub>3</sub>) δ (ppm):** 145.04, 136.38, 116.82, 83.70, 24.91.

**MALDI-TOF:** Molecular weight = 421.15 (calculated), found=421.50 (M)<sup>+</sup>

### **2.9 Synthesis procedure of polymer, NH-PDI:**

200 mg (0.25 mmol) of **compound 2**, 327 mg (0.77 mmol) of intermediate **5**, 332.8 mg (2.40 mmol) of K<sub>2</sub>CO<sub>3</sub> and 15 mg (0.013 mmol) of Pd (PPh<sub>3</sub>)<sub>4</sub> were taken in two neck RB. Next, same procedure was followed as **Benz-PDI** finally 110 mg black **NH-PDI** was obtained.

### 3. Spectroscopic characterization of compound:

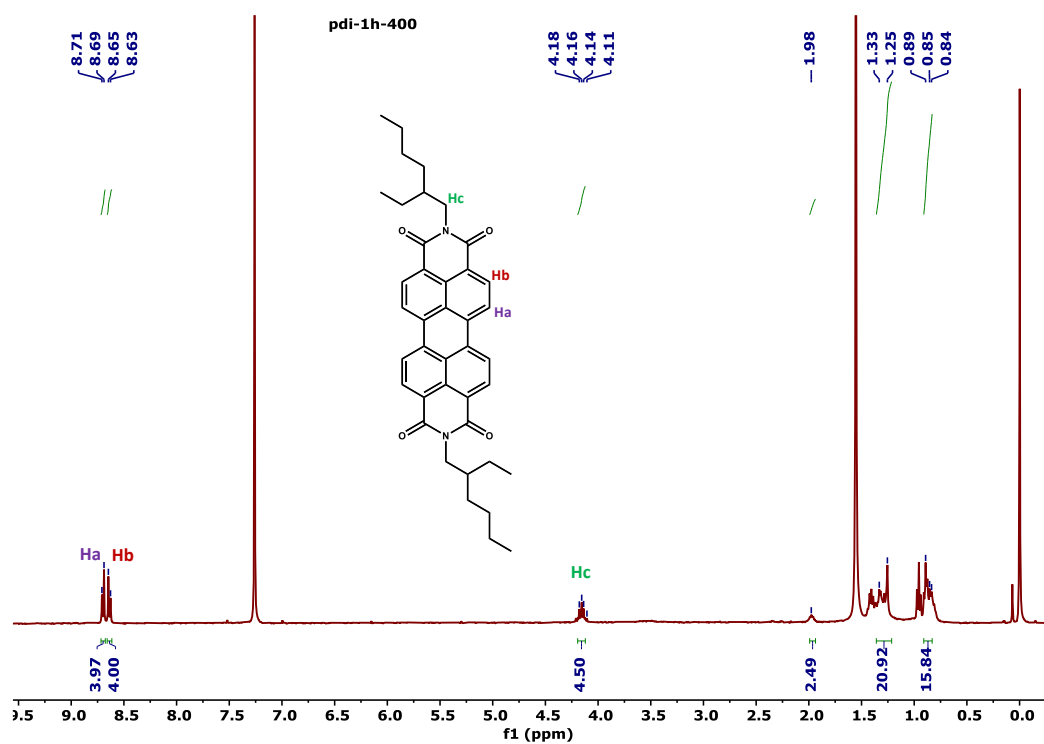

Fig. S2 <sup>1</sup>H NMR of compound **1** in CDCl<sub>3</sub>.

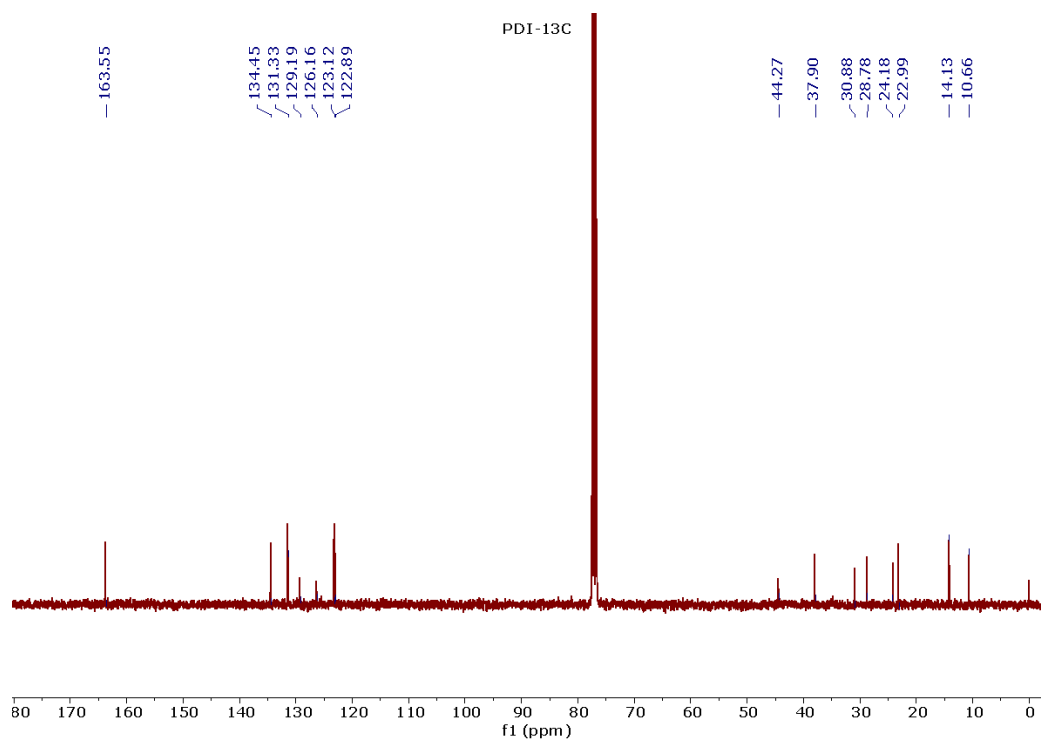

Fig. S3 <sup>13</sup>C NMR of compound **1** in CDCl<sub>3</sub>.

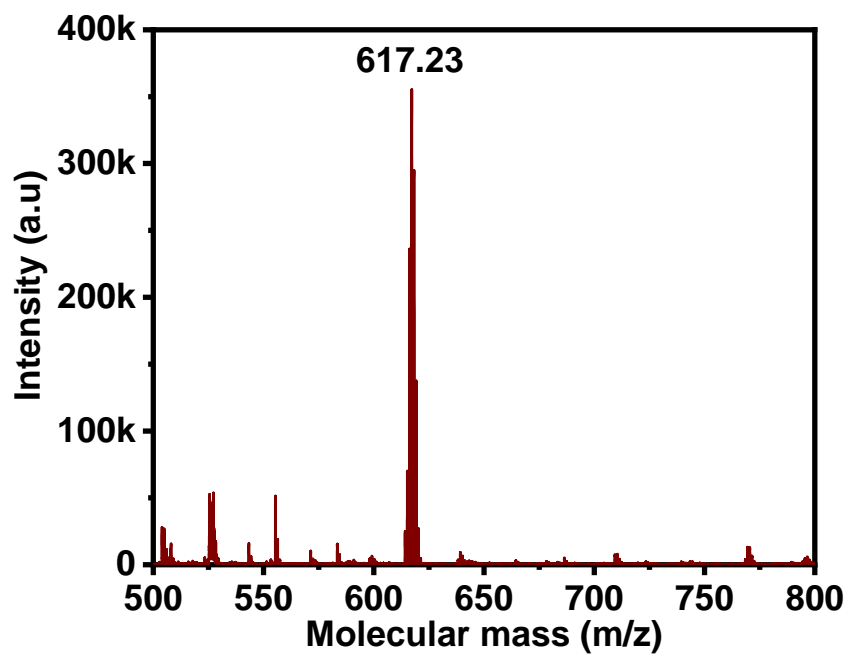

Fig. S4 MALDI-ToF mass of compound **1** using dithranol matrix and  $\text{CHCl}_3$ .

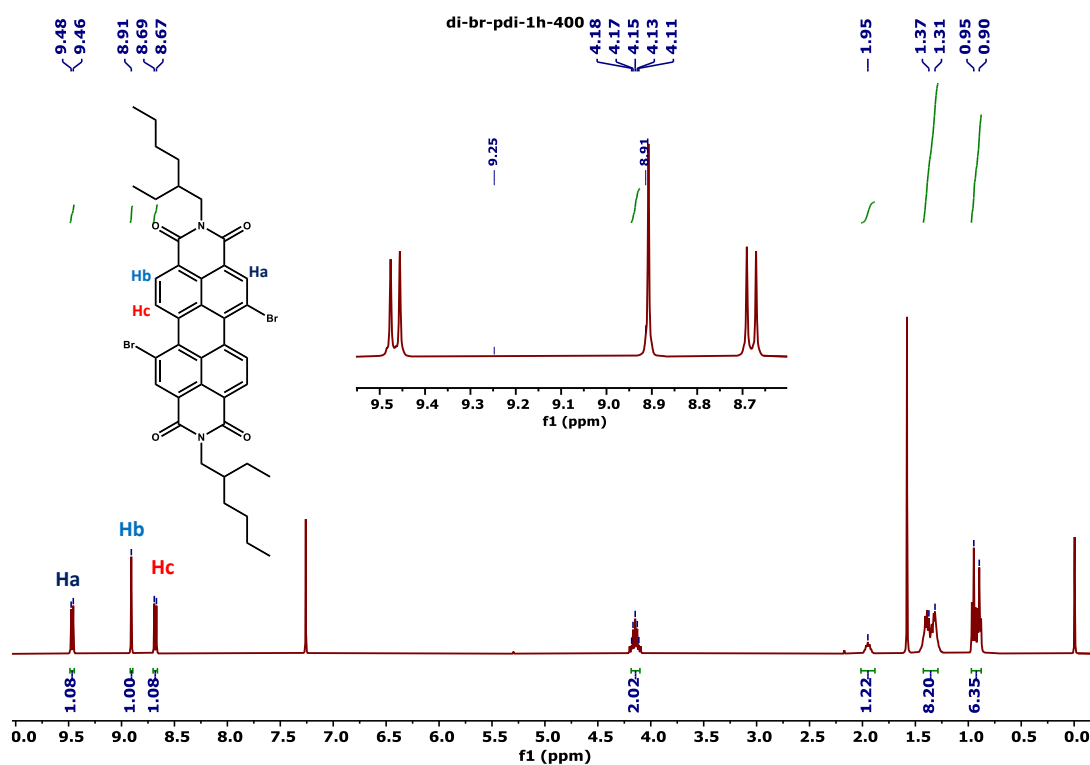

Fig. S5  $^1\text{H}$  NMR of compound **2** in  $\text{CDCl}_3$ .

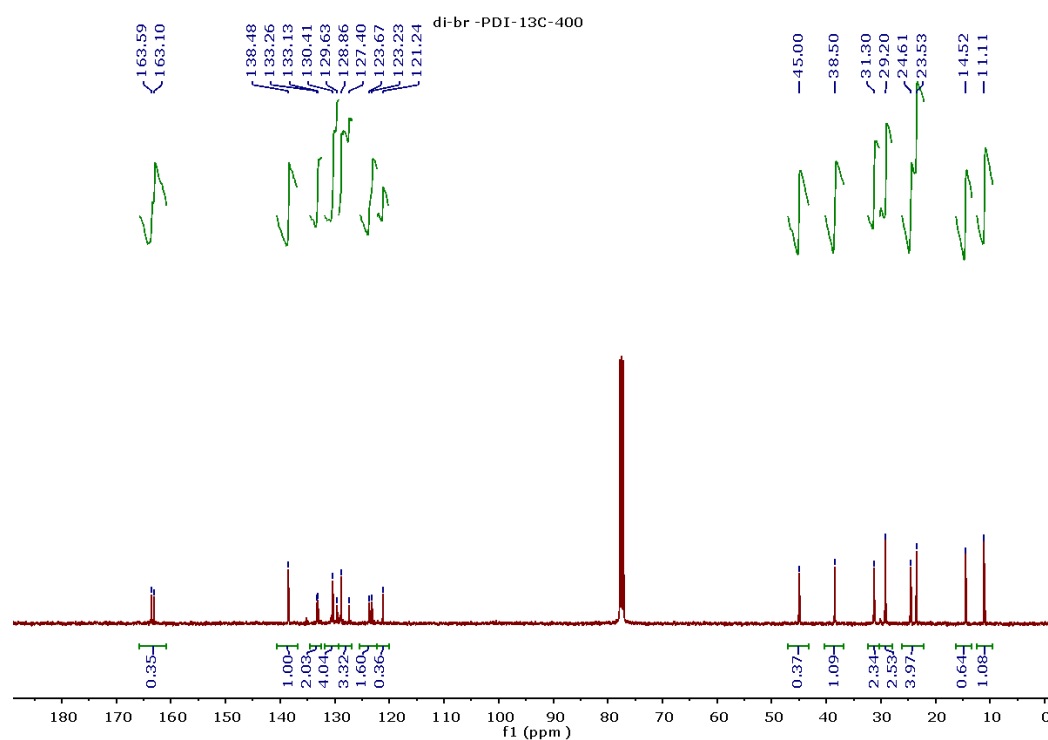

Fig. S6  $^{13}\text{C}$  NMR of compound **2** in  $\text{CDCl}_3$ .

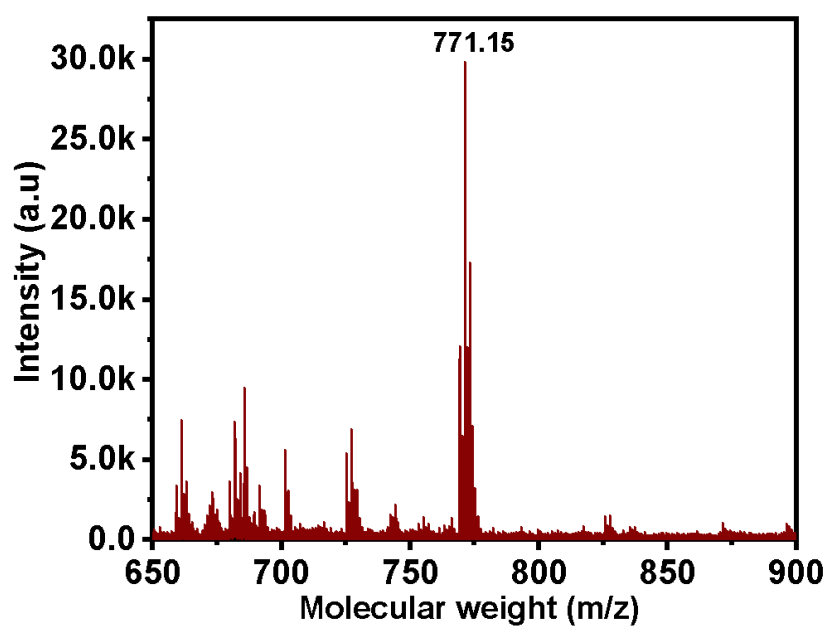

Fig. S7 MALDI-ToF mass of compound **2** using dithranol matrix and  $\text{CHCl}_3$ .

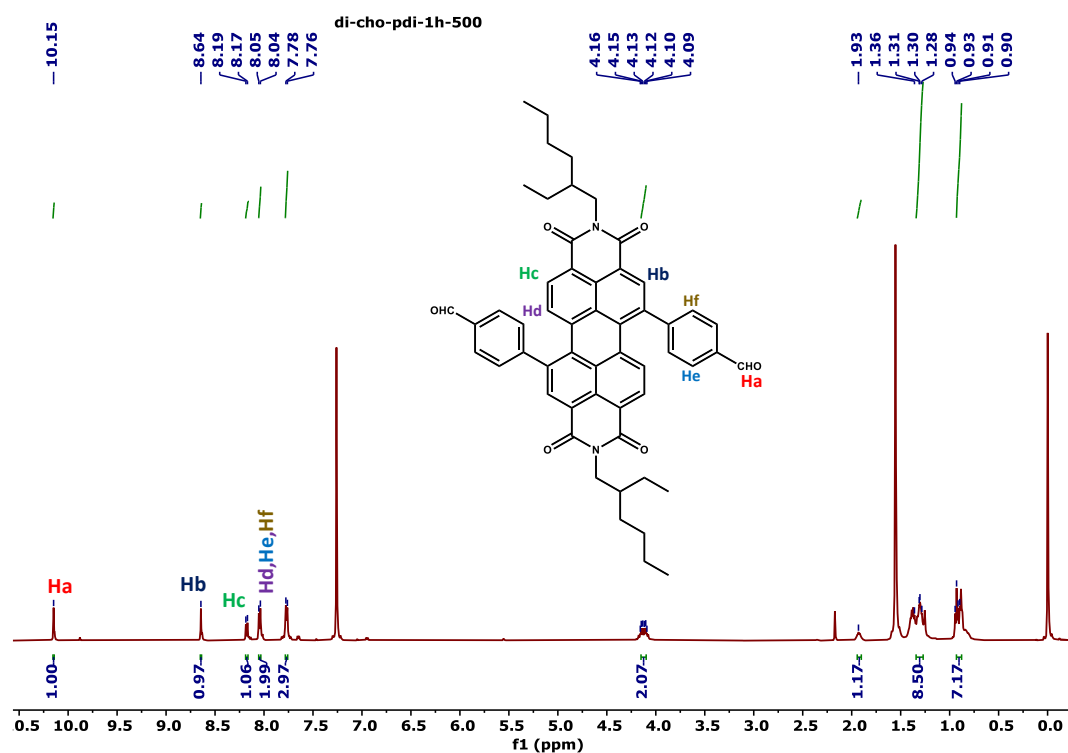

Fig. S8 <sup>1</sup>H NMR of compound **3** in CDCl<sub>3</sub>.

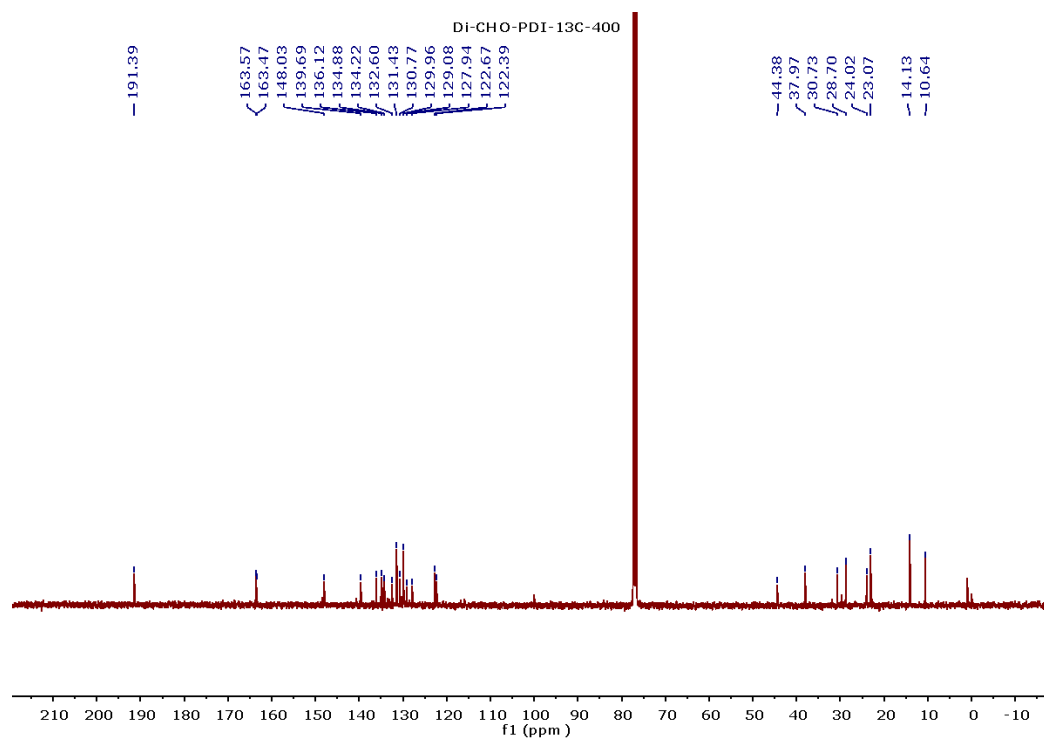

Fig. S9 <sup>13</sup>C NMR of compound **3** in CDCl<sub>3</sub>.

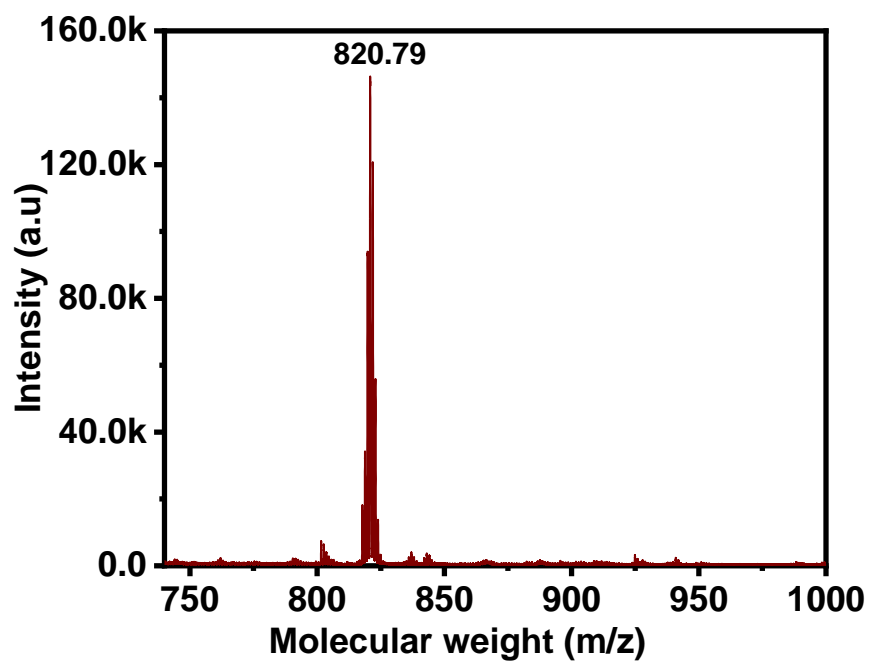

**Fig. S10** MALDI-ToF mass of compound **3** with dithranol matrix.

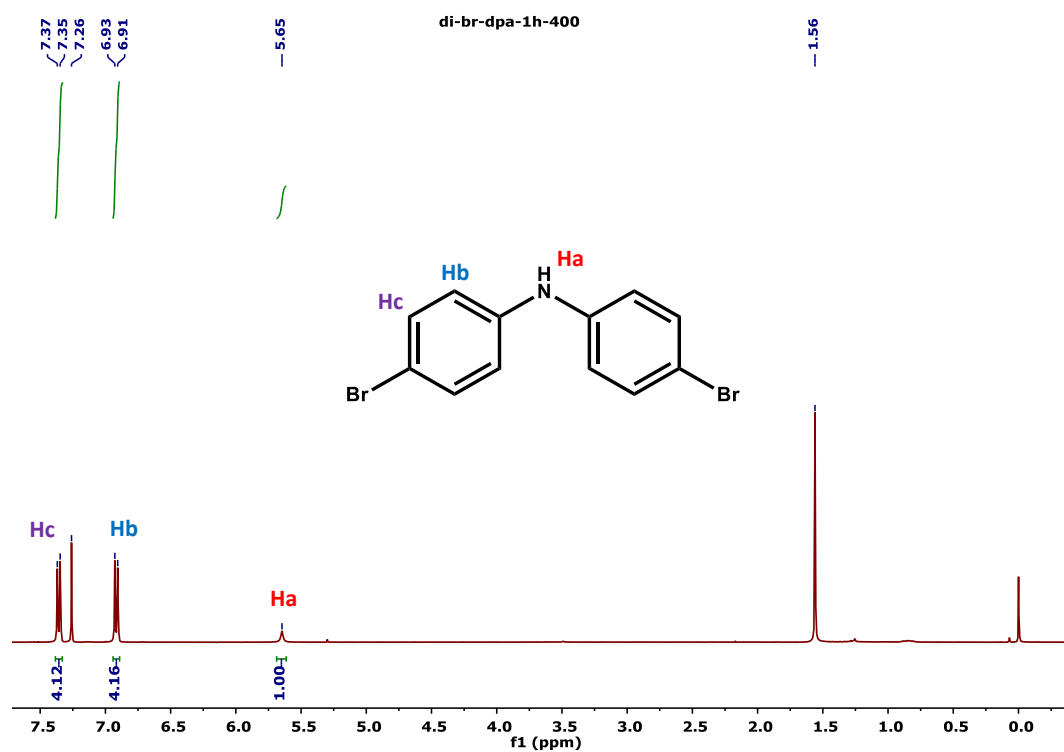

**Fig. S11**  $^1\text{H}$  NMR of compound **4** in  $\text{CDCl}_3$ .

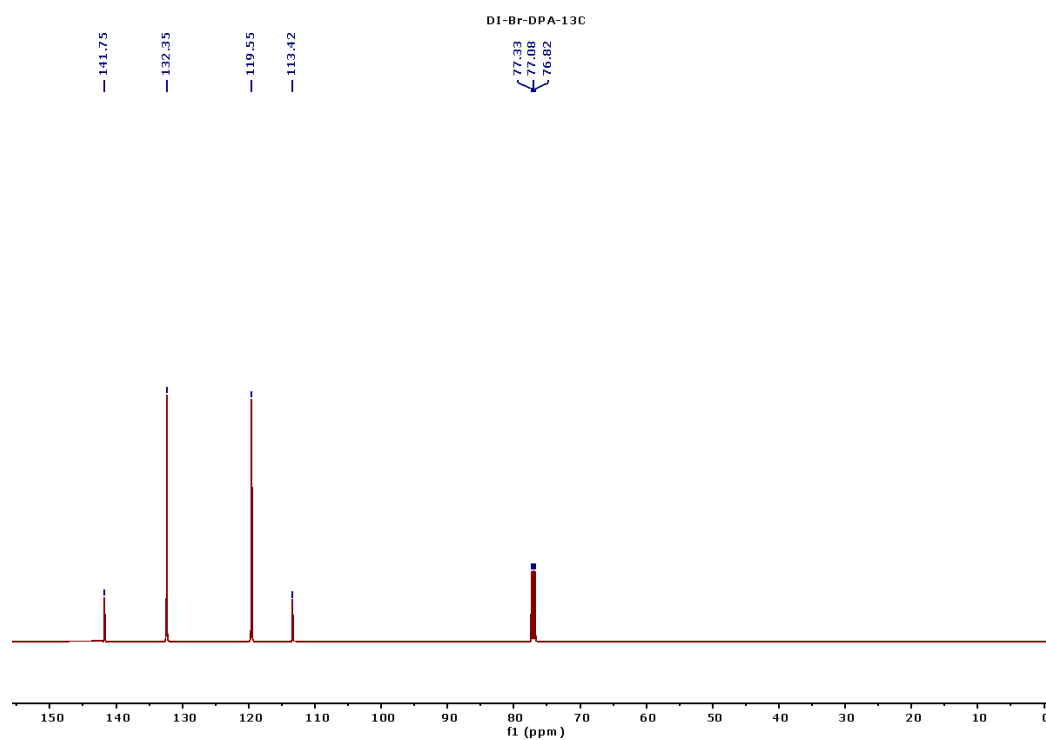

**Fig. S12**  $^{13}\text{C}$  NMR of compound **4** in  $\text{CDCl}_3$ .

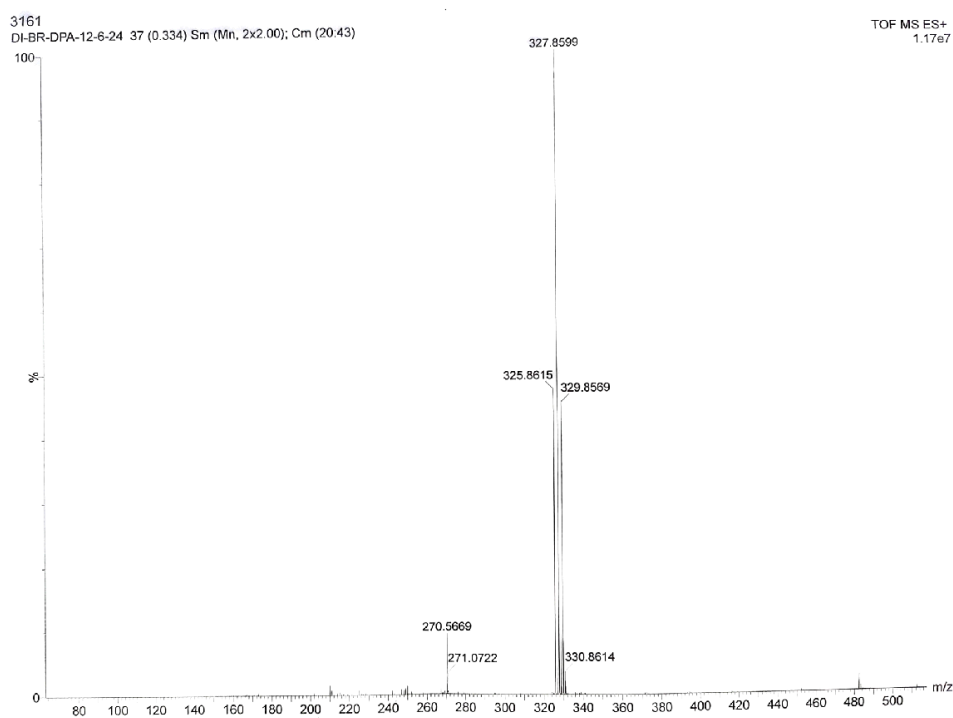

**Fig. S13** HRMS mass of compound **4**.

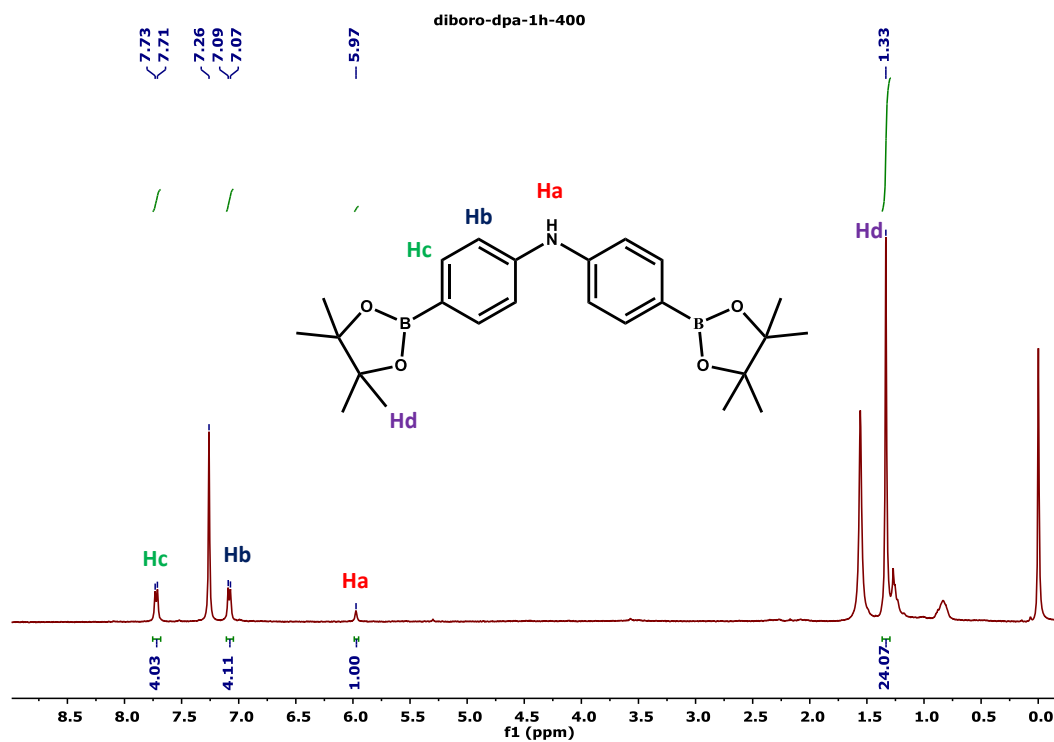

**Fig. S14** <sup>1</sup>H NMR of compound **5** in CDCl<sub>3</sub>.

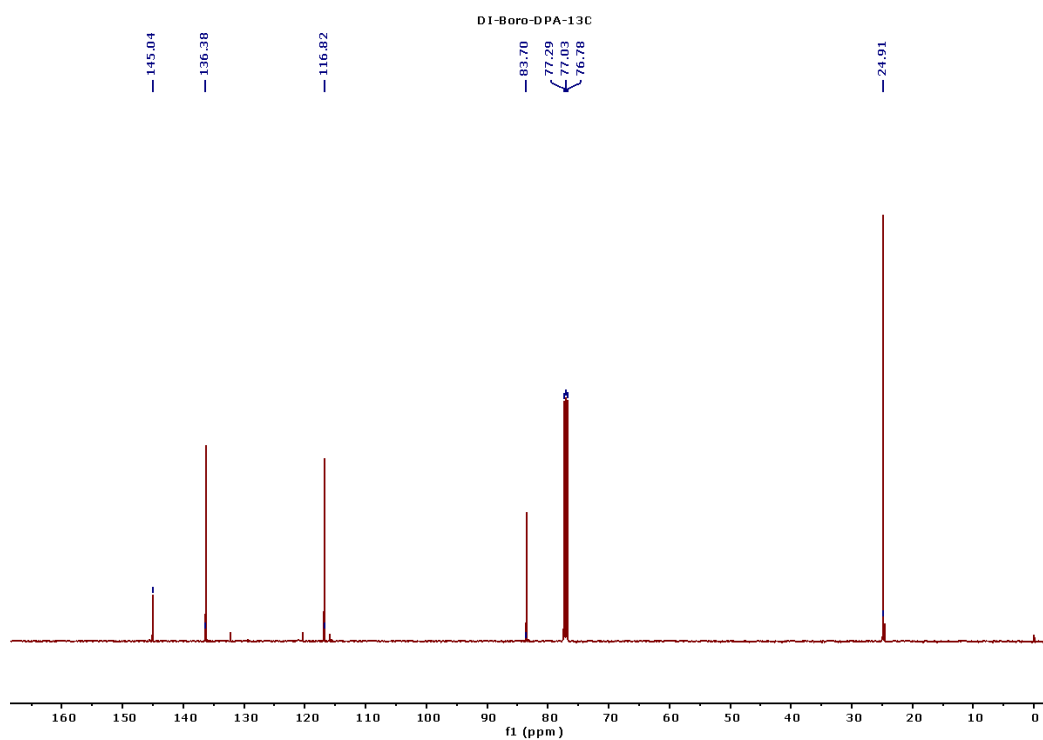

**Fig. S15** <sup>13</sup>C NMR of compound **5** in CDCl<sub>3</sub>.

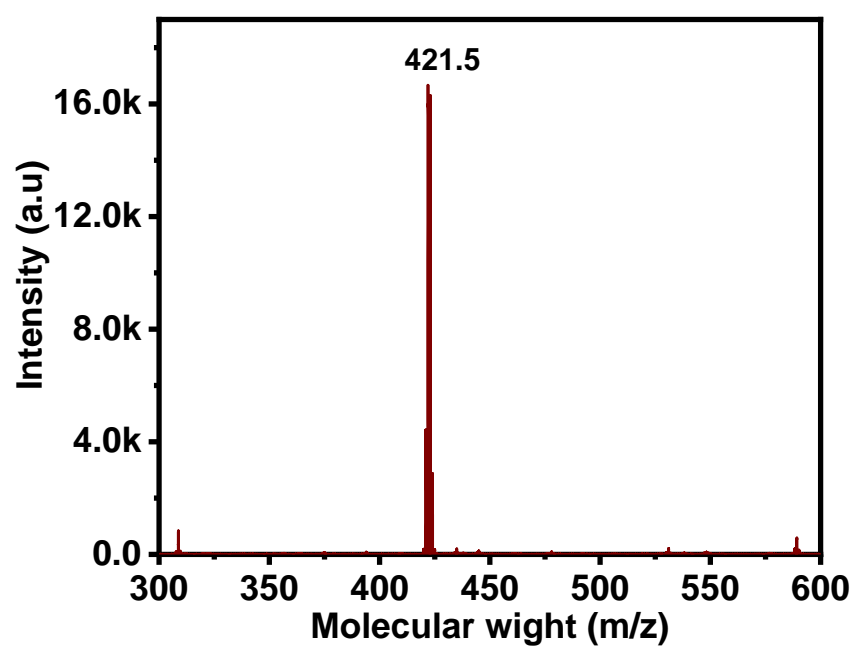

**Fig. S16** MALDI-ToF mass of compound **5** with dithranol matrix.

(a)

Benzo-POI-13C.2.fid  
Benzo-POI-13C

162.69

144.62

141.05

135.14

129.78

122.47

89.74

42.42

37.24

30.11

24.16

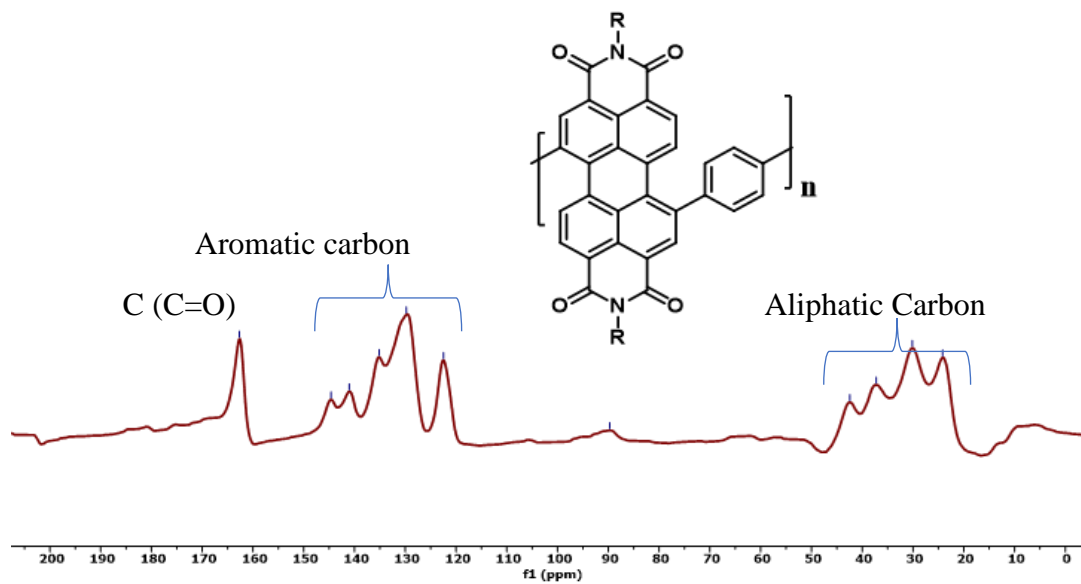

(b)

Tz-Tz-poly-13C.5.fid  
Tz-Tz-poly-13C

168.14

163.04

139.99

129.22

122.33

89.74

49.40

43.08

37.12

29.68

23.89

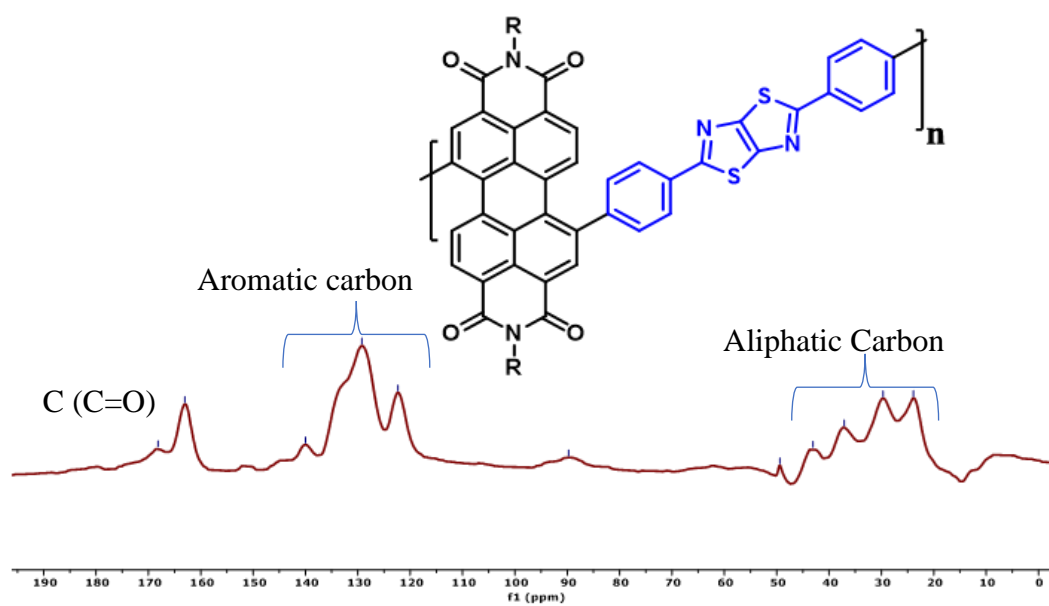

Distribution Plot

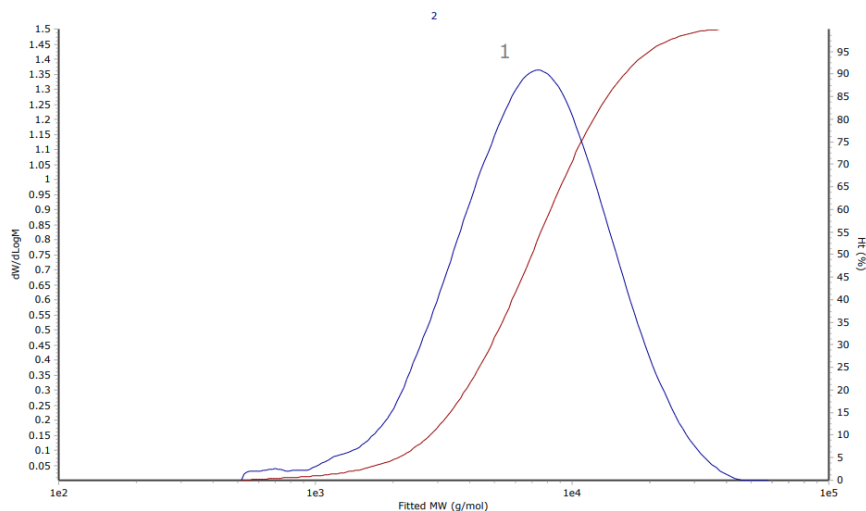

**Fig. S17** Solid state  $^{13}\text{C}$  NMR of (a) Benz-PDI, (b) TzTz-PDI. c) GPC trace of Benz-PDI.

All the copolymers are low soluble in chlorinated solvent likes  $\text{CHCl}_3$ , DCM, and chlorobenzene. Among all the polymers, Benz-PDI is more soluble in chlorobenzene. Gel permeation chromatography (GPC) analysis of Benz-PDI was performed on an Agilent 1260 Infinity II system equipped with MIXED-C column using polystyrene as internal standard and chlorobenzene as eluent at 35 °C.

Result:  $M_w = 8485$ ,  $PDI = 1.62$

#### 4. Physical characterization of polymers.

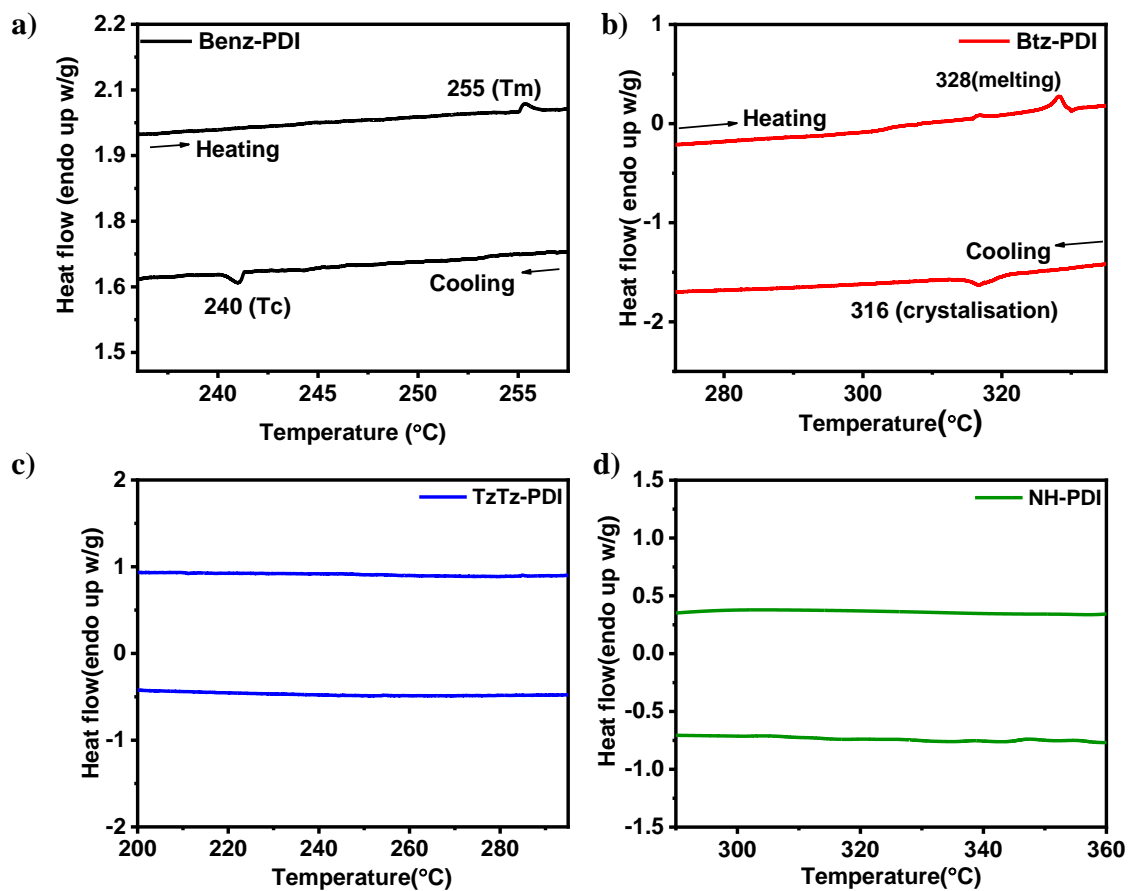

**Fig. S18** Differential scanning calorimetry (DSC) curve of a) Benz-PDI, b) Btz-PDI, c) TzTz-PDI, and d) NH-PDI.

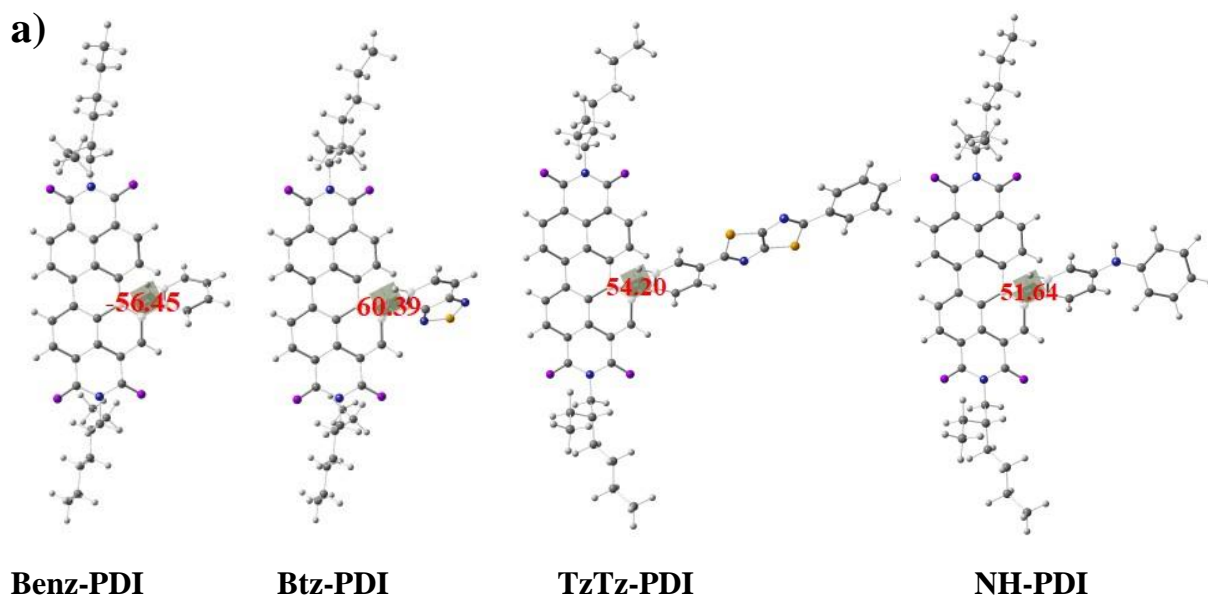

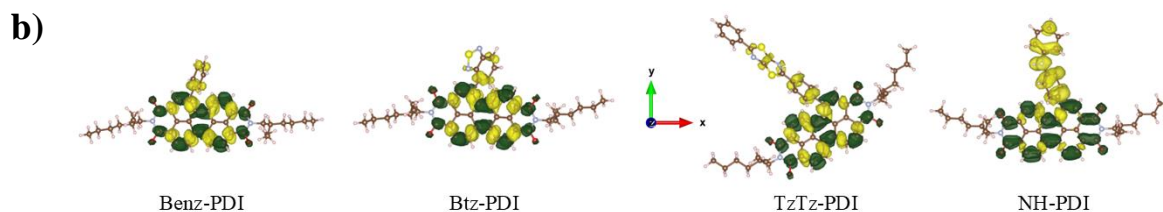

**Fig. S19** a) The optimized molecular structures of the four complexes along with the dihedral angle between PDI and different aromatic linker. b) Calculated transition density difference plots of the investigated systems. The yellow color refers the density loss and green color refers the density gain. The isovalues are of  $\pm 0.0004\text{au}$ .

The TDDFT calculations show that in all cases, the absorption peaks are arisen mainly due to HOMO $\rightarrow$ LUMO electronic transition. The absorption wavelengths for the Benz-PDI, Btz-PDI, TzTz-PDI and NH-PDI are calculated as 474 nm ( $f = 1.13$ ), 472 nm ( $f = 1.08$ ), 482 nm ( $f = 0.95$ ) and 521 nm ( $f = 0.63$ ), respectively. The corresponding energy density plots are illustrated in Fig. S19b. Clearly, the impact of the increasing in donor strength from Benz-PDI to NH-PDI is notable. The HOMO-LUMO overlap integral ( $S_{pq}$ ) for the investigated complexes are calculated as 0.84, 0.85, 0.69 and 0.52, respectively. A decrease in the  $S_{pq}$  value for the NH-PDI agrees with the condition for the charge-transfer phenomenon.

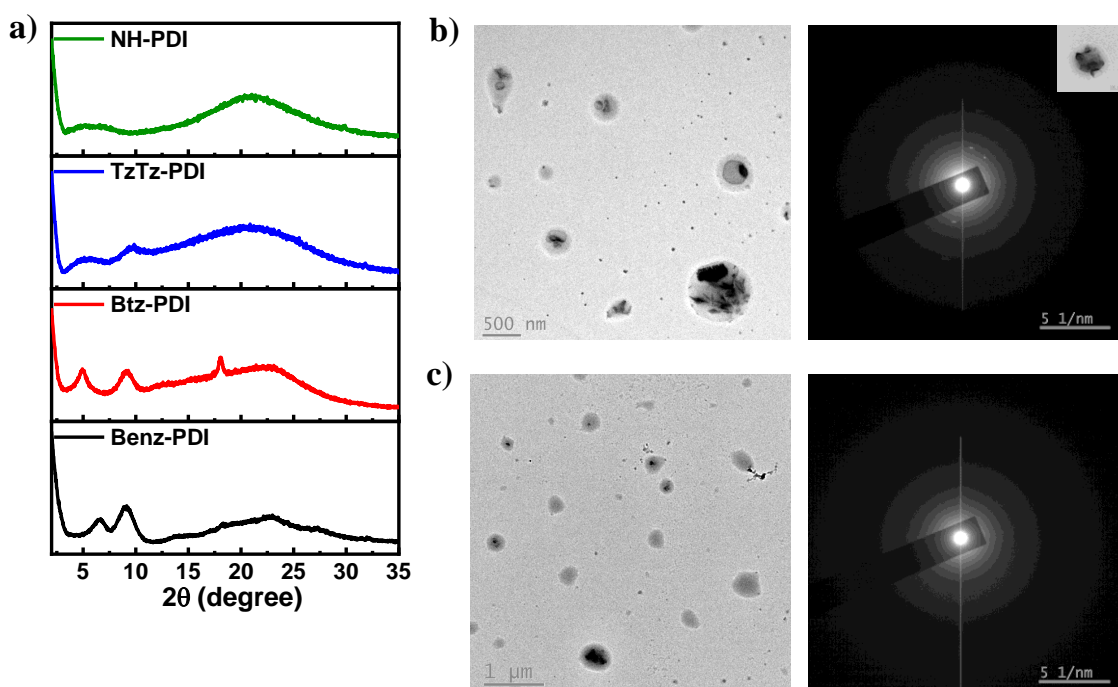

**Fig. S20** a) Powder XRD of all copolymer. FEG-TEM image of b) Benz-PDI c) Btz-PDI.

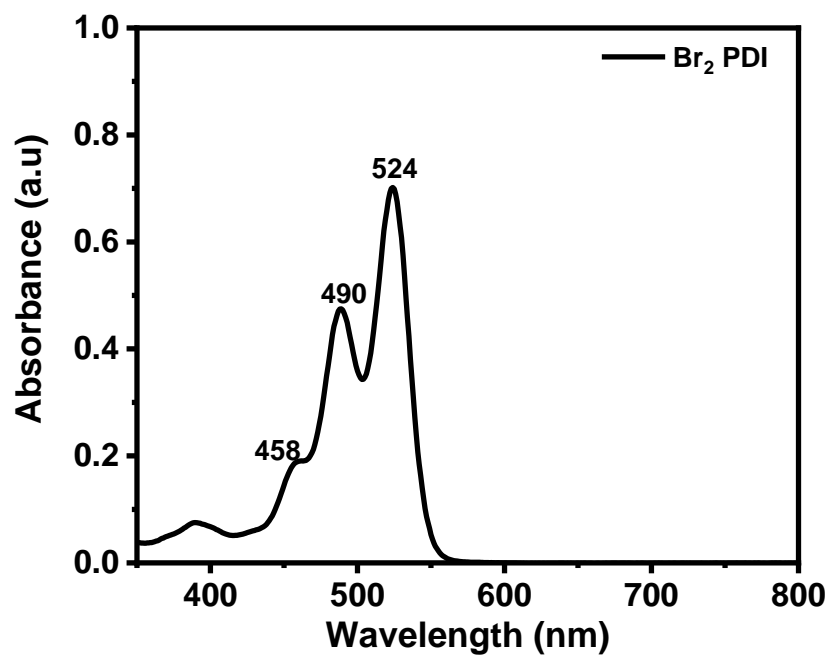

**Fig. S21** UV-Vis absorption spectra of Br<sub>2</sub>-PDI in DCM.

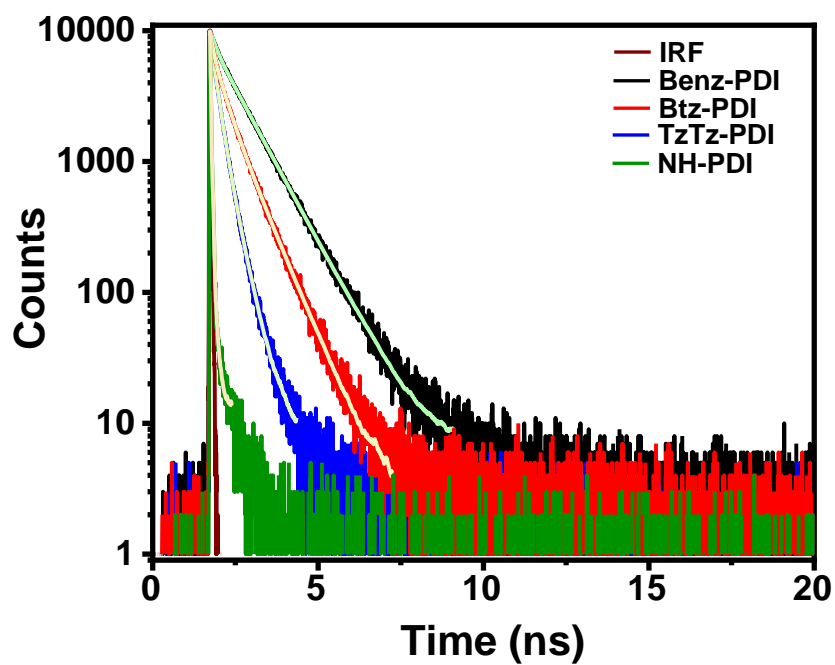

**Fig. S22** TCSPC of all polymers in chloroform solution.

## 5. Morphology study of copolymers:

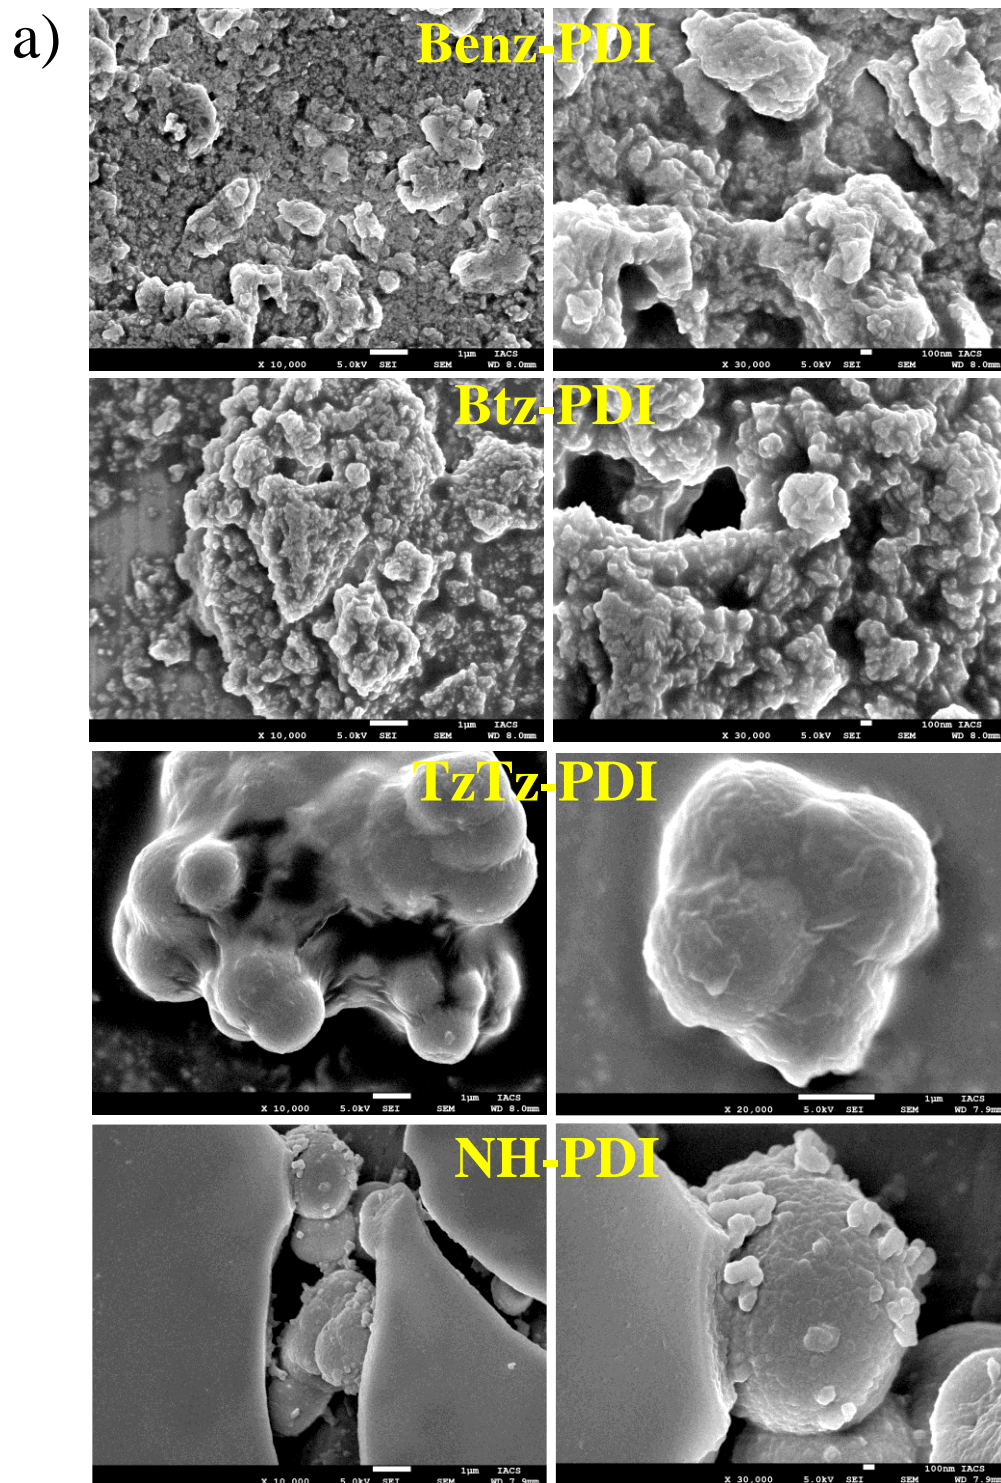

**Fig. S23** a) FESEM image of all copolymer films which are prepared from NMP solution and it was dried for 7 days in vacuum prior to observation.

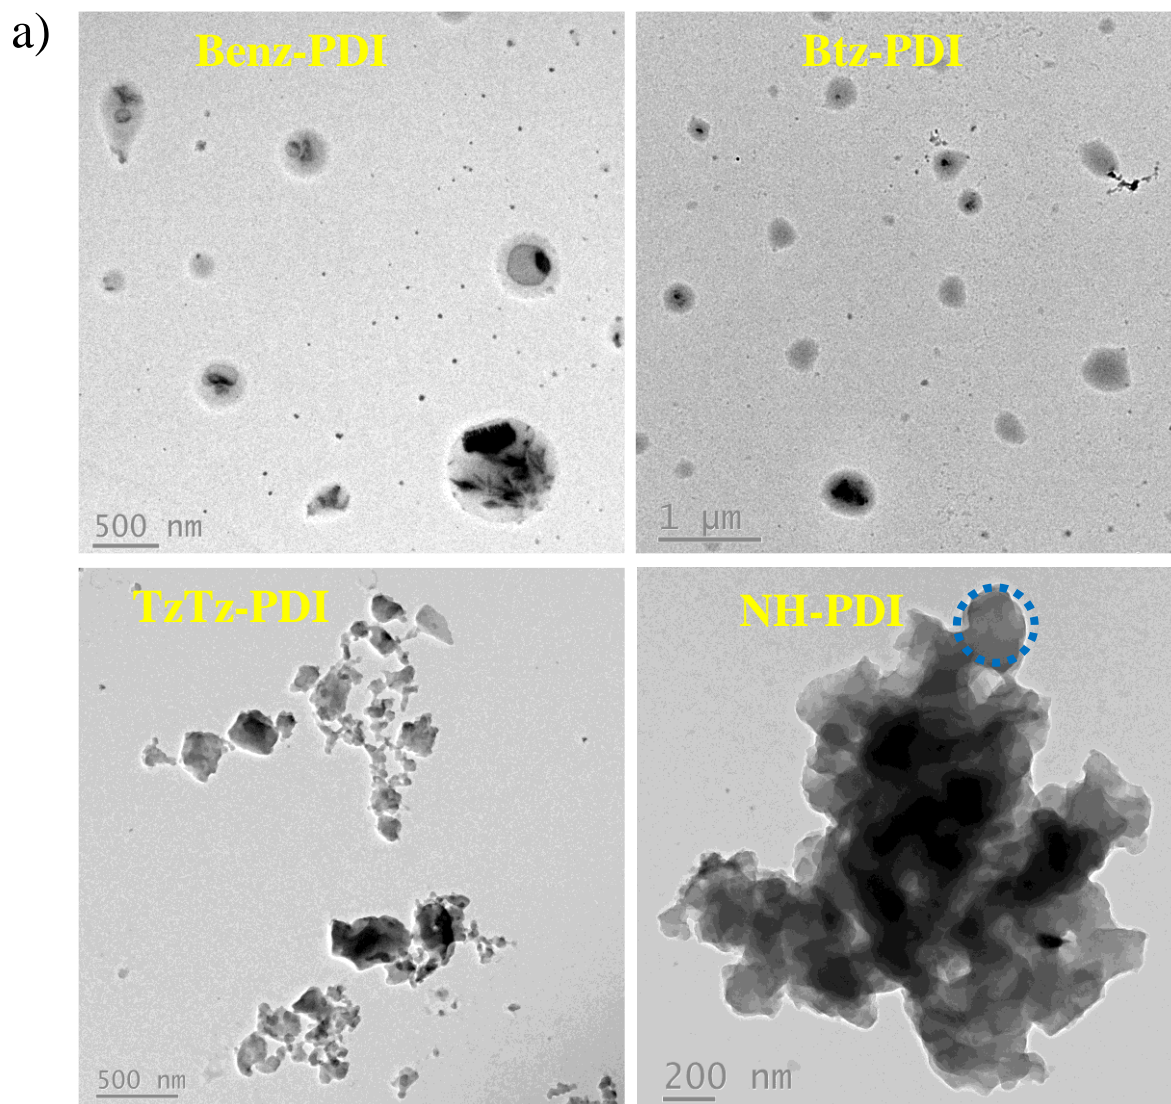

**Fig. S24** a) FEGTEM image of all copolymers and samples were prepared from the dispersed solution in isopropanol and it was cast on the carbon coated Cu grid. The mark part is revealing the stacking of sheets which support the FESEM observation of NH-PDI.

## 6. Electrochemical study.

### 6.1 Electrode fabrication:

a)

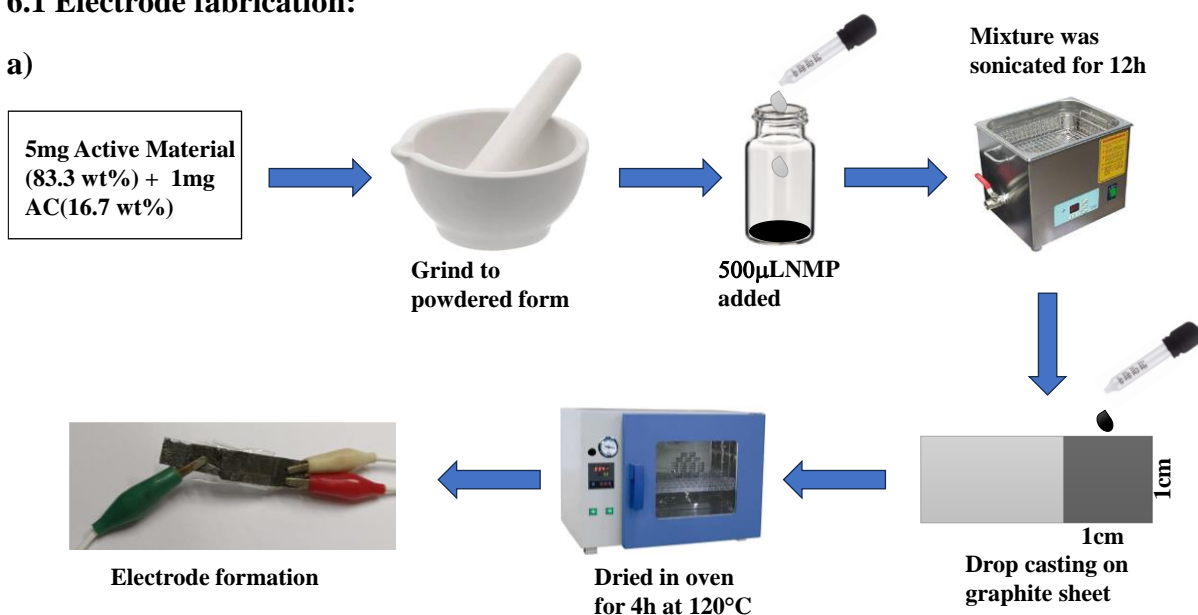

b)

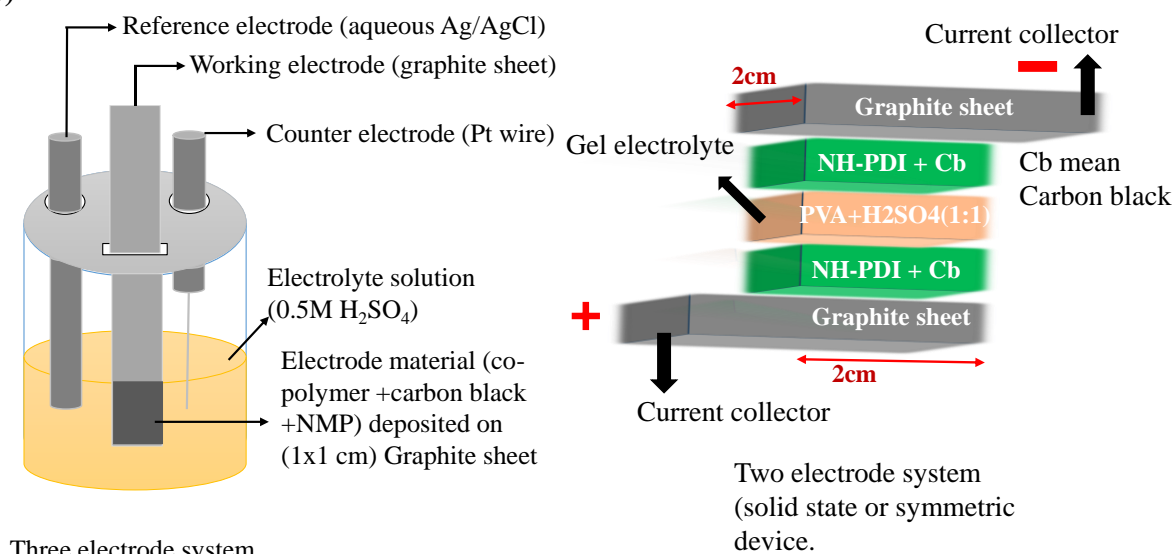

Three electrode system.

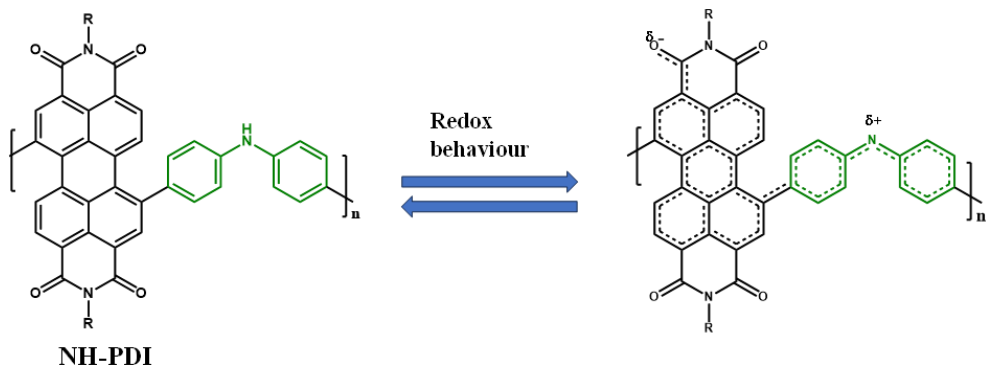

**Fig. S25** a) Schematic representation of electrode fabrication process b) graphical representation of three electrode and two electrode set-ups, respectively. c) Redox behaviour of NH-PDI copolymer, showing the formation of quinoid state.

## 6.2 Calculation of specific capacitance ( $C_{sp}$ ), Energy density (E) and a power density ( $P_{max}$ ):

The discharged specific capacitance ( $C_{sp}$  F  $g^{-1}$ ) was calculated from galvanostatic charge discharge (GCD) curves with the following equation 1.

$$C_{sp} = \frac{i \times \Delta t}{m \times \Delta V} \text{ F } g^{-1} \quad (1)$$

Where,  $i$  is the current density,  $\Delta t$  (s) is the discharge time,  $m$  (g) is the mass of active materials deposited on working electrode and  $\Delta V$  is the voltage window during discharge process.

The energy density (E, Wh  $Kg^{-1}$ ) and power density ( $P_{max}$ , W  $Kg^{-1}$ ) of all polymers were calculated from GCD curve by using the following equation 2,3.

$$E = \frac{C_{sp} \times (\Delta V)^2}{7.2} \text{ Wh } kg^{-1} \quad (2)$$

Where,  $C_{sp}$  is discharged specific capacitance and  $\Delta V$  is the potential range.

$$P_{max} = \frac{E \times 3600}{\Delta t} \text{ W } kg^{-1} \quad (3)$$

Where, E is energy density and  $\Delta t$  (s) is the discharge time.

| Copolymer | Specific capacitance ( $C_{sp}$ ) (F $g^{-1}$ ) at 0.5A $g^{-1}$ | Energy density(E) (Wh $Kg^{-1}$ ) | Power density(P) (W $Kg^{-1}$ ) |
|-----------|------------------------------------------------------------------|-----------------------------------|---------------------------------|
| Benz-PDI  | 131                                                              | 22                                | 274.8                           |
| Btz-PDI   | 119                                                              | 20                                | 274.7                           |
| TzTz-PDI  | 113                                                              | 19                                | 275                             |
| NH-PDI    | 363                                                              | 61                                | 275                             |

**Table S1** Calculated value of  $C_{sp}$ , E, and  $P_{max}$  of all polymer in three electrode system.

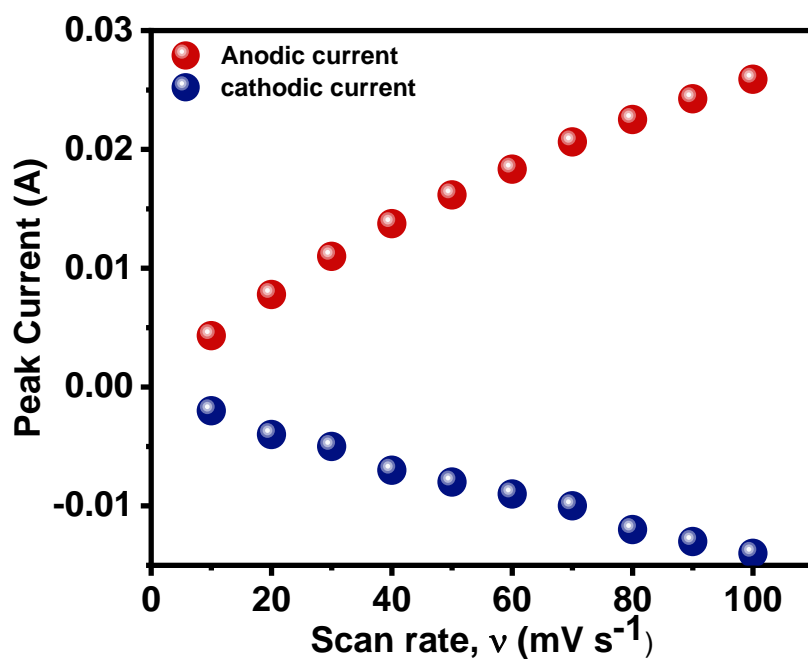

**Fig. S26** Change of peak current with scan rate of 10 mV s<sup>-1</sup> to 100 mV s<sup>-1</sup> of NH-PDI in three electrode system.

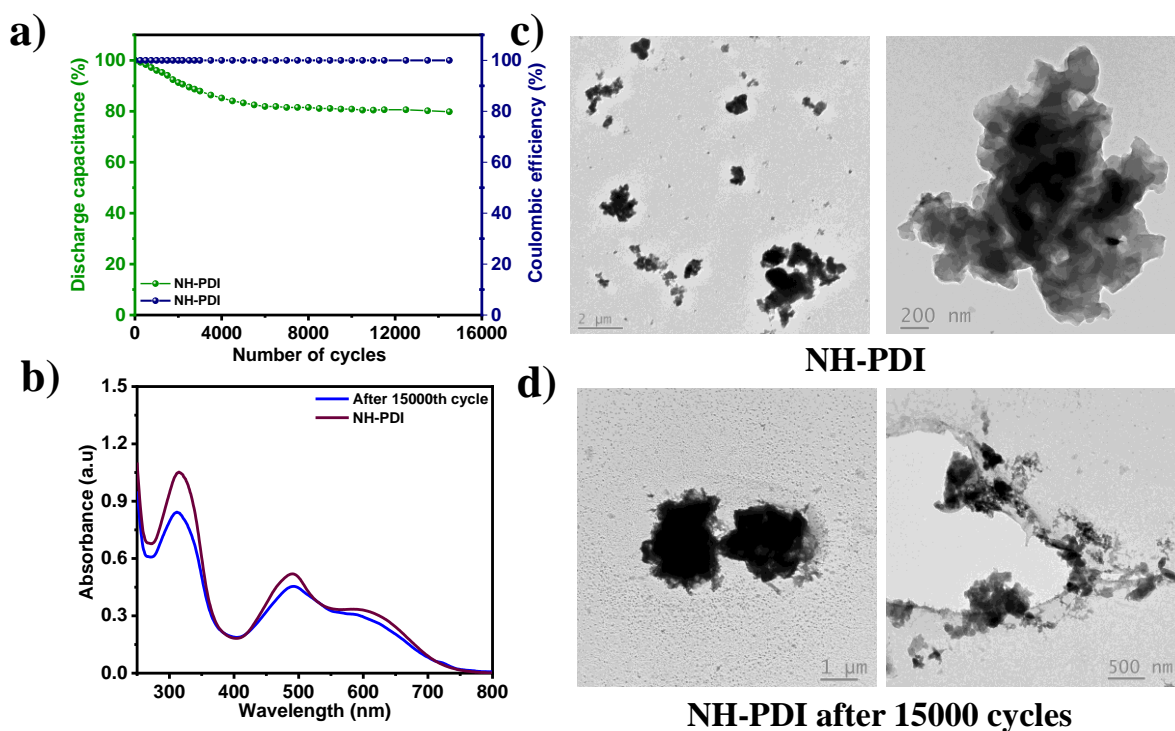

**Fig. S27** a) Discharge capacitance (%) and coulombic efficiency (%) with number of cycles at current density 8 A g<sup>-1</sup> of fabricated device of NH-PDI in three electrode system. b) Absorption spectra of NH-PDI (CHCl<sub>3</sub> solution) before and after 15000 cycles. FEG-TEM images of NH-PDI c) before and d) after 15000 cycles.

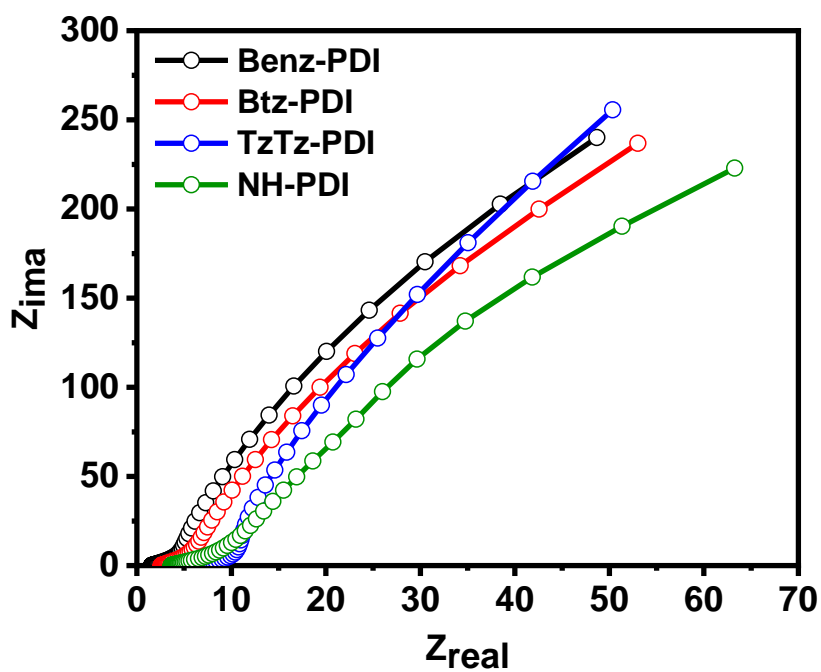

**Fig. S28** Electrochemical Impedance spectra of all polymer in three electrode system.

| Copolymer | Solution resistance ( $\Omega$ ) |
|-----------|----------------------------------|
| Benz-PDI  | 1.5                              |
| Btz-PDI   | 2.5                              |
| TzTz-PDI  | 6.7                              |
| NH-PDI    | 3.5                              |

**Table S2** Solution resistance of copolymer in three electrode system.

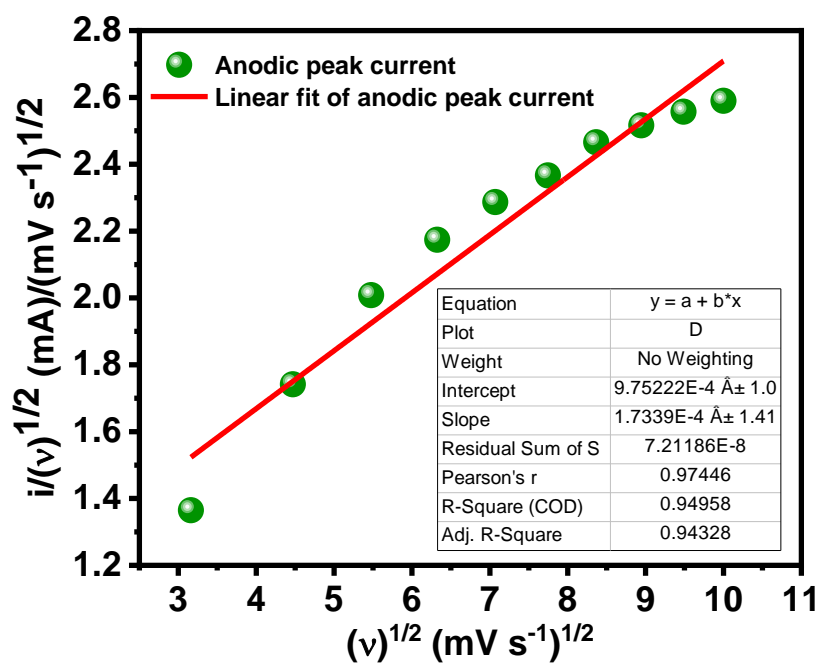

**Fig. S29**  $v^{1/2}$  vs  $i/v^{1/2}$  plot to determined  $k_1$  (slope) and  $k_2$  (intercept) value.

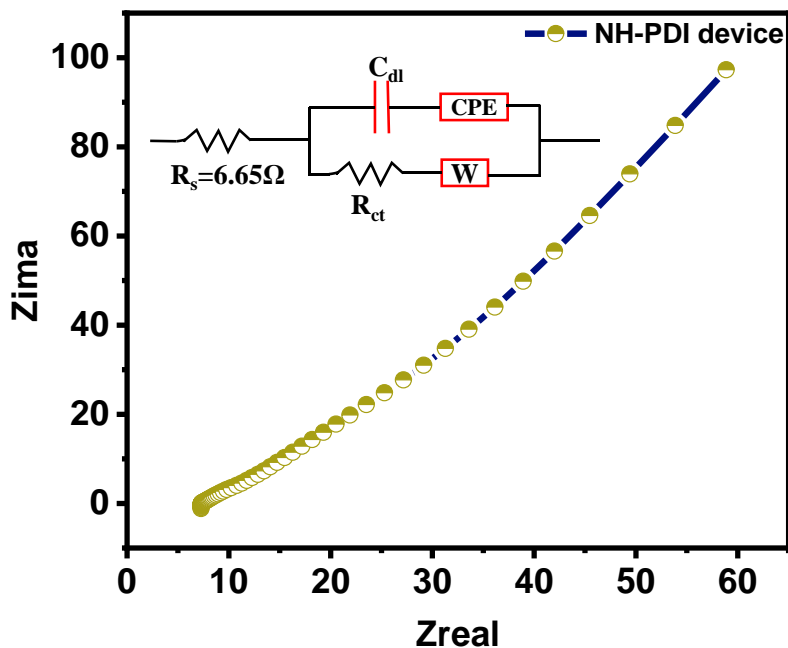

**Fig. S30** Electrochemical Impedance spectra (EIS) of NH-PDI device in solid state.

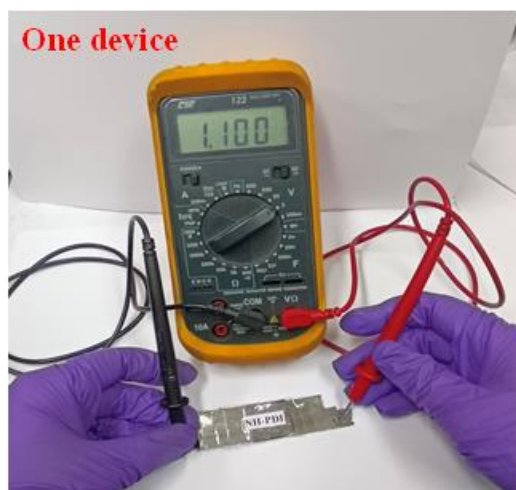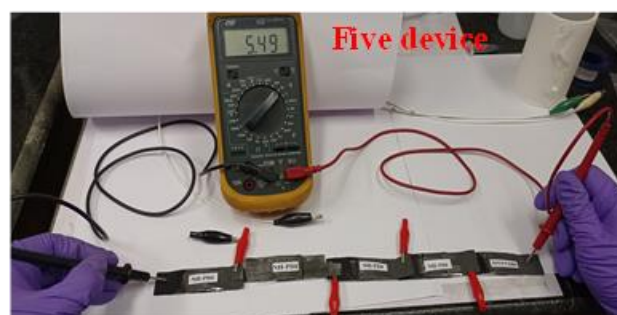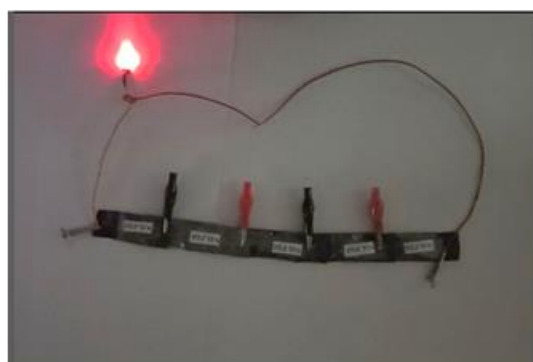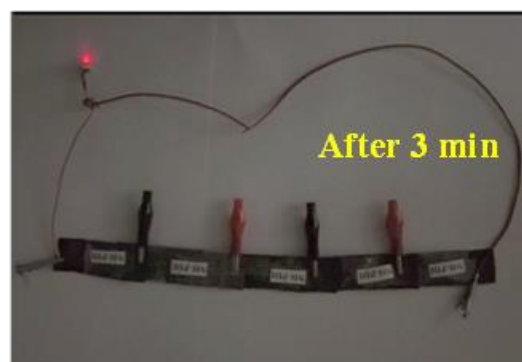

**Fig. S31** Picture showing individual potential of one device, series connection of five devices and illumination of LED (3.0V)

**7. Table-S3. Comparison table**

| Chemical structure                                                                                                | Electrolyte                                 | Type of working electrode                | Specific capacitance (C <sub>sp</sub> )            | Energy density (E)                            | Power density (P <sub>max</sub> )                | Cyclic stability @ current density A g <sup>-1</sup> | % retention C <sub>sp</sub> after nth cycle | Reference |
|-------------------------------------------------------------------------------------------------------------------|---------------------------------------------|------------------------------------------|----------------------------------------------------|-----------------------------------------------|--------------------------------------------------|------------------------------------------------------|---------------------------------------------|-----------|
| 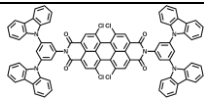 <p><b>4Cz-4Cl-PBI</b></p>       |                                             | Electro polymerisation<br>On ITO         | 241.2 F g <sup>-1</sup> at 0.5 Ag <sup>-1</sup>    | 22.07 mWh cm <sup>-3</sup>                    | 17.4 W cm <sup>-3</sup>                          |                                                      |                                             | 6         |
| 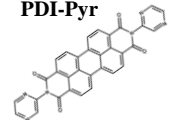 <p><b>PDI-Pyr</b></p>           | 1 M H <sub>2</sub> SO <sub>4</sub>          | <b>Two electrodes</b><br>Graphite foil   | 192 F g <sup>-1</sup> at 1 Ag <sup>-1</sup>        | 54 Wh kg <sup>-1</sup>                        | 27 KW kg <sup>-1</sup>                           | 4000 @ 3                                             | 88.13                                       | 7         |
| 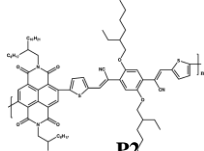 <p><b>P2</b></p>                | 0.5 M H <sub>2</sub> SO <sub>4</sub>        | <b>Three electrodes</b><br>Graphite foil | 124 F g <sup>-1</sup> at 0.5 Ag <sup>-1</sup>      | 2 Wh kg <sup>-1</sup>                         | 22 KW kg <sup>-1</sup>                           | 5000 @ 5                                             | 100                                         | 8         |
| 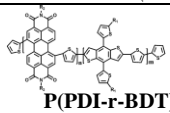 <p><b>P(PDI-r-BDT)</b></p>      | PC-LiClO <sub>4</sub> gel                   | <b>Three electrodes</b>                  | 113 F g <sup>-1</sup> at 0.5 Ag <sup>-1</sup>      | 9.1 Wh kg <sup>-1</sup>                       | 82 KW kg <sup>-1</sup>                           | 4000 @ 2                                             | 100                                         | 9         |
| 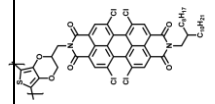 <p><b>PDI-4Cl-EDOT-O12</b></p> | PMMA / TBAPF <sub>6</sub> /acetonitrile gel | electro polymerisation                   | 78.6 F g <sup>-1</sup> at 0.5 Ag <sup>-1</sup>     | 8.95 Wh kg <sup>-1</sup> At 1Ag <sup>-1</sup> | 76.8 KW kg <sup>-1</sup> At 100 Ag <sup>-1</sup> | 1000 @ 10                                            | 79.6                                        | 10        |
| 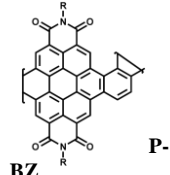 <p><b>P-BZ</b></p>            | 5M NaCl                                     | <b>Three electrodes</b><br>Carbon paper  | 250 ± 34 F g <sup>-1</sup> at 0.5 Ag <sup>-1</sup> |                                               |                                                  |                                                      |                                             | 11        |

|                                                                                                                    |                                             |                                    |                                                               |                            |                            |           |    |                           |
|--------------------------------------------------------------------------------------------------------------------|---------------------------------------------|------------------------------------|---------------------------------------------------------------|----------------------------|----------------------------|-----------|----|---------------------------|
| 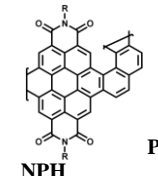 <p><b>NPH</b></p>                | 5M NaCl                                     | Three electrodes<br>Carbon paper   | $292 \pm 47$<br>$\text{F g}^{-1}$ at<br>$0.5 \text{ Ag}^{-1}$ |                            |                            |           |    | 11                        |
| 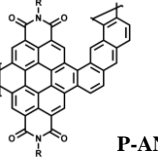 <p><b>P-ANH</b></p>              | 5M NaCl                                     | Three electrodes<br>Carbon paper   | $147 \pm 18 \text{ F g}^{-1}$<br>at $0.5 \text{ Ag}^{-1}$     |                            |                            |           |    | 11                        |
| 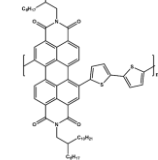 <p><b>P(PDI2OD-T2)/MWCNT</b></p> | PMMA<br>$\text{LiClO}_4$ gel<br>electrolyte | Two electrodes                     | $84.2 \text{ F g}^{-1}$ at<br>$0.25 \text{ Ag}^{-1}$          | $112.4 \text{ Wh kg}^{-1}$ | $18,600 \text{ W kg}^{-1}$ | 45000 @ 2 | 70 | 12                        |
| 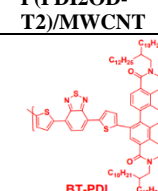 <p><b>BT-PDI</b></p>             | 0.1M<br>$\text{TBAPF}_6$                    | Three electrodes<br>Carbon cloth   | $196 \text{ F g}^{-1}$ at<br>$1 \text{ Ag}^{-1}$              |                            |                            | 5000 @ 5  | 76 | 13                        |
| 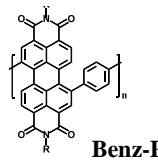 <p><b>Benz-PDI</b></p>          | 0.5 M<br>$\text{H}_2\text{SO}_4$            | Three electrodes<br>Graphite sheet | $131 \text{ F g}^{-1}$ at<br>$0.5 \text{ Ag}^{-1}$            | $22 \text{ Wh kg}^{-1}$    | $274.8 \text{ W kg}^{-1}$  |           |    | <a href="#">This work</a> |
| 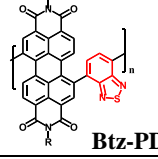 <p><b>Btz-PDI</b></p>          | 0.5 M<br>$\text{H}_2\text{SO}_4$            | Three electrodes<br>Graphite sheet | $119 \text{ F g}^{-1}$ at<br>$0.5 \text{ Ag}^{-1}$            | $20 \text{ Wh kg}^{-1}$    | $274.7 \text{ W kg}^{-1}$  |           |    | <a href="#">This work</a> |

|                                                                                                   |                                                 |                                                               |                                                    |                          |                             |           |      |              |
|---------------------------------------------------------------------------------------------------|-------------------------------------------------|---------------------------------------------------------------|----------------------------------------------------|--------------------------|-----------------------------|-----------|------|--------------|
| 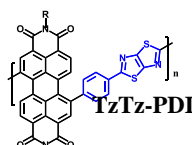 <p>IzTz-PDI</p> | 0.5 M<br>H <sub>2</sub> SO <sub>4</sub>         | Three electrodes<br><br>Graphite sheet                        | 113 F g <sup>-1</sup> at<br>0.5A g <sup>-1</sup>   | 19 Wh kg <sup>-1</sup>   | 274.7 W<br>kg <sup>-1</sup> |           |      | This<br>work |
|                                                                                                   | 0.5 M<br>H <sub>2</sub> SO <sub>4</sub>         | Three electrodes<br><br>Graphite sheet<br>(working electrode) | 363.4 F g <sup>-1</sup> at<br>0.5A g <sup>-1</sup> | 61.1 Wh kg <sup>-1</sup> | 275 W kg <sup>-1</sup>      | 15000 @ 8 | 80   | This work    |
|                                                                                                   | PVA-<br>H <sub>2</sub> SO <sub>4</sub><br>(1:1) | Two electrodes<br><br>Graphite sheet<br>(working electrode)   | 134.2 F g <sup>-1</sup> at<br>0.5A g <sup>-1</sup> | 22.2 Wh kg <sup>-1</sup> | 274.8 W<br>kg <sup>-1</sup> | 20000 @ 8 | 69.1 | This work    |

## 7. Reference

1. Z. Liang, W. Limin, Z. Guanjun, Y. Jianjun, C. Xiaofei, T. Mingshuang, W. Yue, *Chin. J. Chem.*, 2012, **30**, 2823-2826.
2. P. Rajasing, R. Cohen, E. Shirman, L. J. W. Shimon, B. Rybtchinski, *J. Org. Chem.*, 2007, **72**, 5973-5979.
3. K. Sharma, G. Singh, G. Singh, M. Kumar, V. Bhalla, *RSC Adv.*, 2015, **5**, 25781-25788.
4. C. W. Ge, C.Y. Mei, J. Ling, J. T. Wang, F. G. Zhao, L. Liang, H. J. Li, Y. S. Xie, W. S. Li, *J. Polym. Sci. Part A: Polym. Chem.*, 2014, **52**, 1200-1215.
5. H. Zhang, Y. Mao, J. Xu, S. Li, F. Guo, L. Zhu, J. Wang, Y. Wu, *J. Mater. Chem.*, C.2022, **10**, 1862–1869.
6. L. Qin, W. Ma, M. Hanif, J. Jiang, Z. Xie, Y. Ma, *Macromolecules*, 2017, **50**, 3565-3572.
7. D. S. Jagdale, K.R. C. Rao, V. S. Bhosale, V. S. Bhosale, *Chem. Eng. J. Adv.*, 2023, **14**, 100499.
8. S. Sharma, R. Soni, S. Kurungot, S. K. Asha, *Macromolecules*, 2018, **51**, 954-965.
9. S. Sharma, R. Soni, S. Kurungot, S. K. Asha, *J. Phys. Chem. C*, 2019, **123**, 2084-2093.
10. M. B. Miltenburg, S. Y. An, N. K. Obhi, E. Grignon, B. T. McAllister, D. Seferos, *ACS Appl. Polym. Mater.*, 2020, **2**, 5574-5580.
11. J. Gray, V. A. Posey, N. M. Orchanian, Z. Jin, M. L. Steigerwald, X. Roy, C. Nuckolls, *Chem. Mater.*, 2024, **36**, 4861-4867.
12. A. A. Wavhal, S. Dilwale, P. P. Puthiyaveetil, R. N. Kakde, M. Prakash, S. Kurungot, S. K. Asha, *J. Phys. Chem. C*, 2024, **128**, 12808-12821.
13. S. K. pati, D. Patra, S. Muduli, S. Mishra, S. Park, *J. Mater. Chem. A*, 2024,**12**, 21165-21175.
